# Supplementary material
Source: publisher figshare collection journal article supplement (https://asha.figshare.com/articles/dataset/_/21998153)

Supplemental Material S1.

# Phonological Awareness Assessment

Note: Form A and Examples are the published PALS-K subtests (Invernizzi et al., 2014) and administration follows published instructions.

## Phonological Awareness

### Form B

Based on Invernizzi et al. (2014)

#### Rhyme

|              |       |       |       | +/ - |
|--------------|-------|-------|-------|------|
| <b>bag</b>   | tag   | sun   | chair |      |
| <b>bed</b>   | fan   | gum   | head  |      |
| <b>bee</b>   | book  | tree  | moon  |      |
| <b>gate</b>  | house | skate | nose  |      |
| <b>glove</b> | cake  | mop   | dove  |      |
| <b>hat</b>   | glass | cape  | cat   |      |
| <b>mouse</b> | nut   | vest  | house |      |
| <b>dog</b>   | car   | frog  | jam   |      |
| <b>fish</b>  | dish  | sun   | mop   |      |
| <b>goat</b>  | fox   | coat  | cap   |      |
| TOTAL        |       |       |       |      |

#### Initial Sounds

|              |       |      |      | +/ - |
|--------------|-------|------|------|------|
| <b>kite</b>  | bee   | cake | fox  |      |
| <b>mouse</b> | moon  | cone | pig  |      |
| <b>lamp</b>  | fan   | tree | leaf |      |
| <b>sun</b>   | duck  | sock | fish |      |
| <b>bird</b>  | wheel | bug  | nose |      |
| <b>pig</b>   | moon  | duck | pie  |      |
| <b>bus</b>   | gum   | bee  | top  |      |
| <b>king</b>  | cat   | book | vase |      |
| <b>shoe</b>  | sheep | cone | dog  |      |
| <b>two</b>   | wheel | toes | fox  |      |
| TOTAL        |       |      |      |      |

# Phonological Awareness

## Form C

Based on Invernizzi et al. (2014)

### Rhyme

|              |       |      |       | +/ - |
|--------------|-------|------|-------|------|
| <b>car</b>   | net   | pig  | bar   |      |
| <b>talk</b>  | frog  | walk | hand  |      |
| <b>dish</b>  | boat  | fish | moon  |      |
| <b>bat</b>   | hat   | leaf | bell  |      |
| <b>coat</b>  | goat  | boy  | cap   |      |
| <b>tree</b>  | glass | bee  | cat   |      |
| <b>head</b>  | tent  | sock | bed   |      |
| <b>phone</b> | fox   | bell | cone  |      |
| <b>book</b>  | cow   | hook | whale |      |
| <b>vest</b>  | nest  | tree | foot  |      |
| TOTAL        |       |      |       |      |

### Initial Sounds

|             |       |      |       | +/ - |
|-------------|-------|------|-------|------|
| <b>sink</b> | kite  | sun  | log   |      |
| <b>moon</b> | mouse | fish | car   |      |
| <b>bug</b>  | hay   | bird | ring  |      |
| <b>fox</b>  | hat   | gum  | fan   |      |
| <b>duck</b> | saw   | dog  | horse |      |
| <b>nose</b> | van   | nut  | lips  |      |
| <b>pie</b>  | pig   | ball | wheel |      |
| <b>leaf</b> | wall  | bike | lamp  |      |
| <b>bell</b> | ship  | bus  | key   |      |
| <b>cake</b> | dog   | bed  | cat   |      |
| TOTAL       |       |      |       |      |

## Phonological Awareness

### Form D

Based on Invernizzi et al. (2014)

#### Rhyme

|              |        |       |       | +/ - |
|--------------|--------|-------|-------|------|
| <b>bear</b>  | cake   | lamp  | pear  |      |
| <b>sink</b>  | drink  | vase  | bed   |      |
| <b>door</b>  | leaf   | sock  | four  |      |
| <b>gum</b>   | tree   | drum  | rose  |      |
| <b>moose</b> | goose  | slide | wheel |      |
| <b>tool</b>  | pool   | box   | gate  |      |
| <b>bath</b>  | chair  | kite  | path  |      |
| <b>wife</b>  | fish   | knife | lake  |      |
| <b>road</b>  | cheese | toad  | tag   |      |
| <b>tall</b>  | shoe   | duck  | wall  |      |
| TOTAL        |        |       |       |      |

#### Initial Sounds

|              |       |      |        | +/ - |
|--------------|-------|------|--------|------|
| <b>mop</b>   | mouse | tack | rose   |      |
| <b>cheer</b> | fan   | leaf | cheese |      |
| <b>knee</b>  | dove  | nest | race   |      |
| <b>bike</b>  | fox   | top  | bee    |      |
| <b>vase</b>  | book  | vest | hat    |      |
| <b>soap</b>  | sock  | egg  | cat    |      |
| <b>gate</b>  | boy   | king | goat   |      |
| <b>corn</b>  | kite  | lime | toe    |      |
| <b>match</b> | pig   | moon | cone   |      |
| <b>one</b>   | wing  | bus  | pie    |      |
| TOTAL        |       |      |        |      |

# Phonological Awareness

## Form E

Based on Invernizzi et al. (2014)

### Rhyme

|              |       |       |       | +/ - |
|--------------|-------|-------|-------|------|
| <b>mat</b>   | bag   | rat   | duck  |      |
| <b>sun</b>   | one   | dog   | house |      |
| <b>jog</b>   | keys  | car   | log   |      |
| <b>lip</b>   | ship  | boy   | moon  |      |
| <b>pen</b>   | rope  | hen   | leaf  |      |
| <b>nut</b>   | slide | top   | hut   |      |
| <b>chain</b> | rain  | spoon | bed   |      |
| <b>cake</b>  | fox   | head  | rake  |      |
| <b>grape</b> | king  | tape  | sock  |      |
| <b>row</b>   | cane  | bow   | five  |      |
| TOTAL        |       |       |       |      |

### Initial Sounds

|             |       |       |      | +/ - |
|-------------|-------|-------|------|------|
| <b>book</b> | egg   | box   | nest |      |
| <b>wing</b> | witch | chair | pie  |      |
| <b>home</b> | kite  | head  | ring |      |
| <b>pot</b>  | fan   | gate  | pig  |      |
| <b>can</b>  | net   | hose  | cape |      |
| <b>jump</b> | rose  | jam   | shoe |      |
| <b>top</b>  | toe   | lake  | vase |      |
| <b>dog</b>  | sheep | fish  | dove |      |
| <b>leaf</b> | lime  | bug   | goat |      |
| <b>man</b>  | moose | cab   | hat  |      |
| TOTAL       |       |       |      |      |

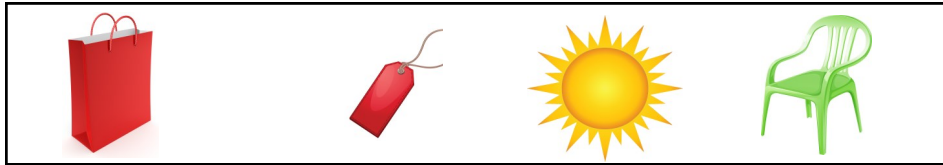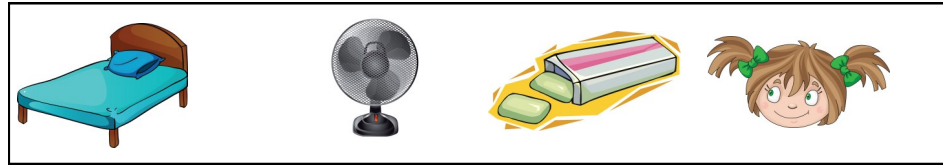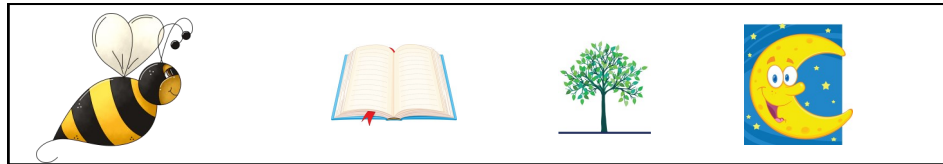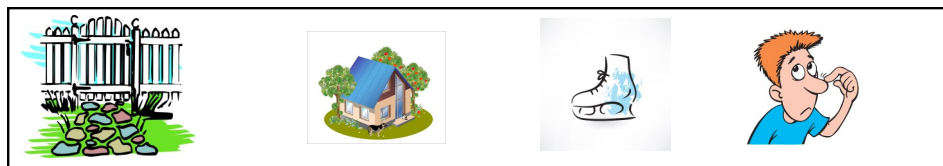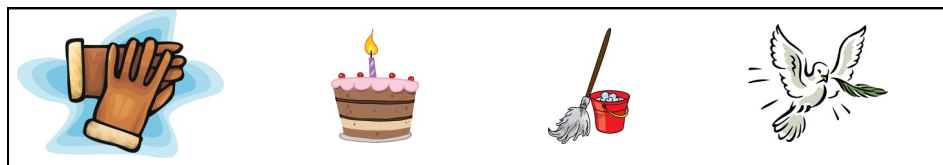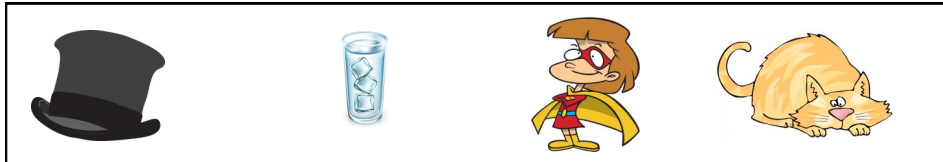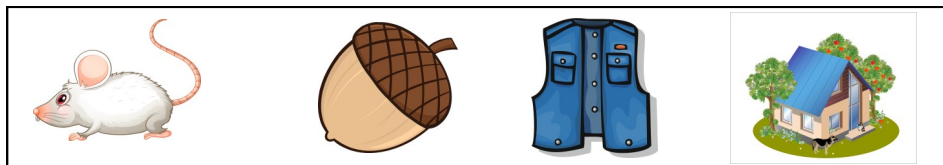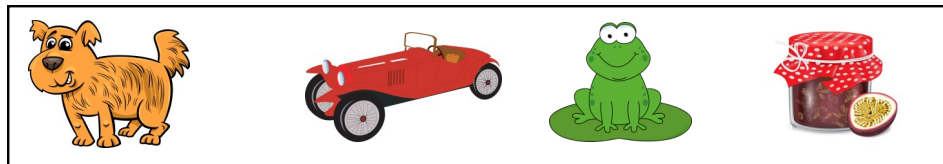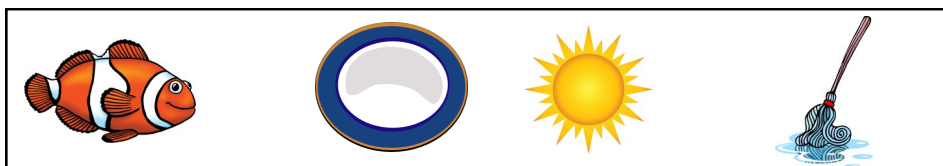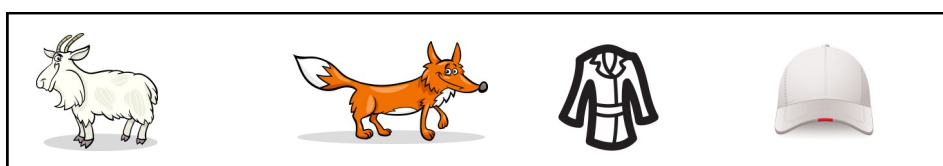

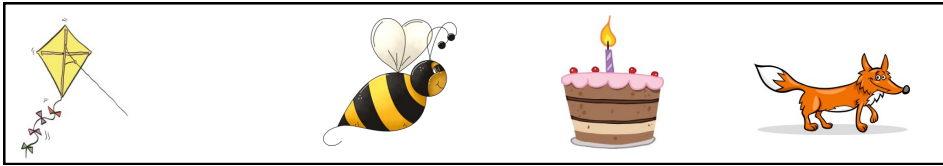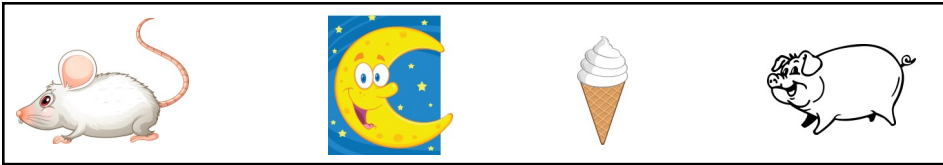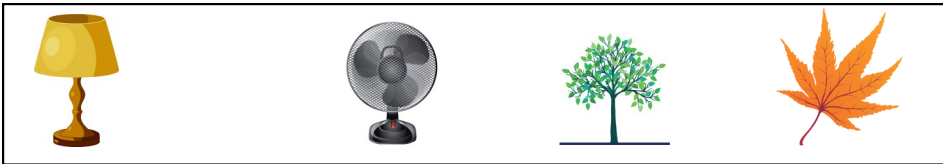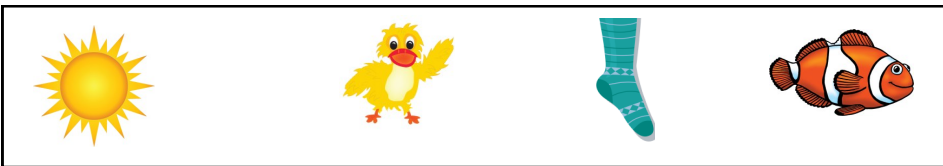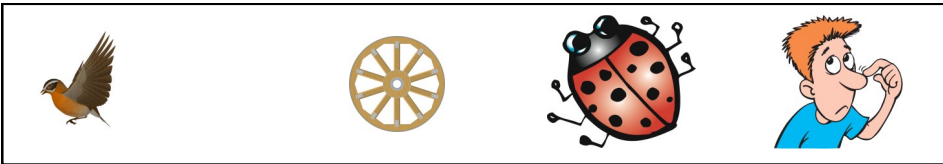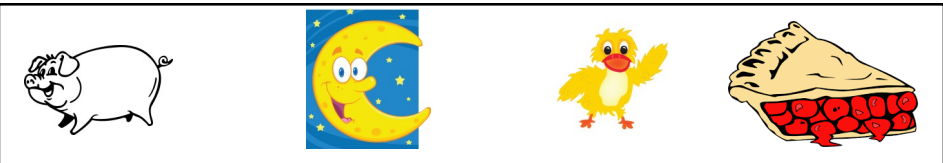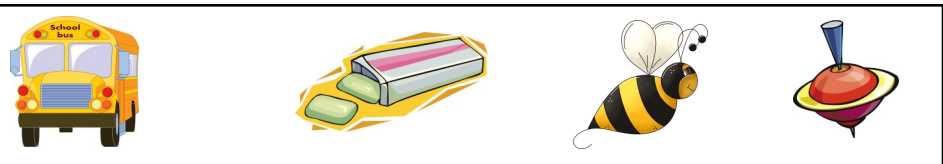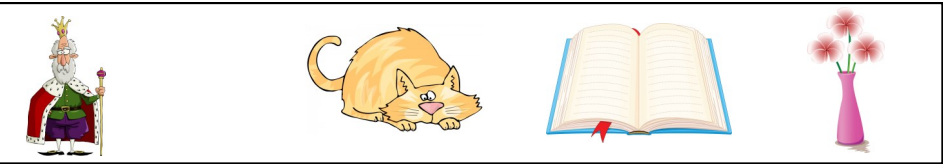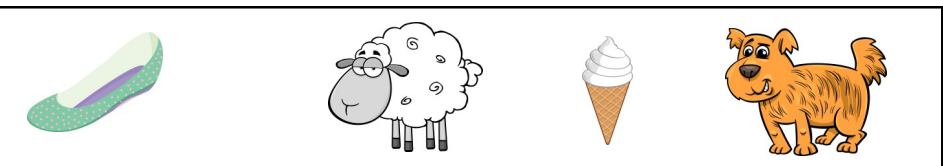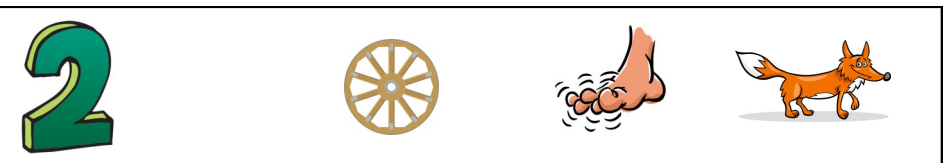

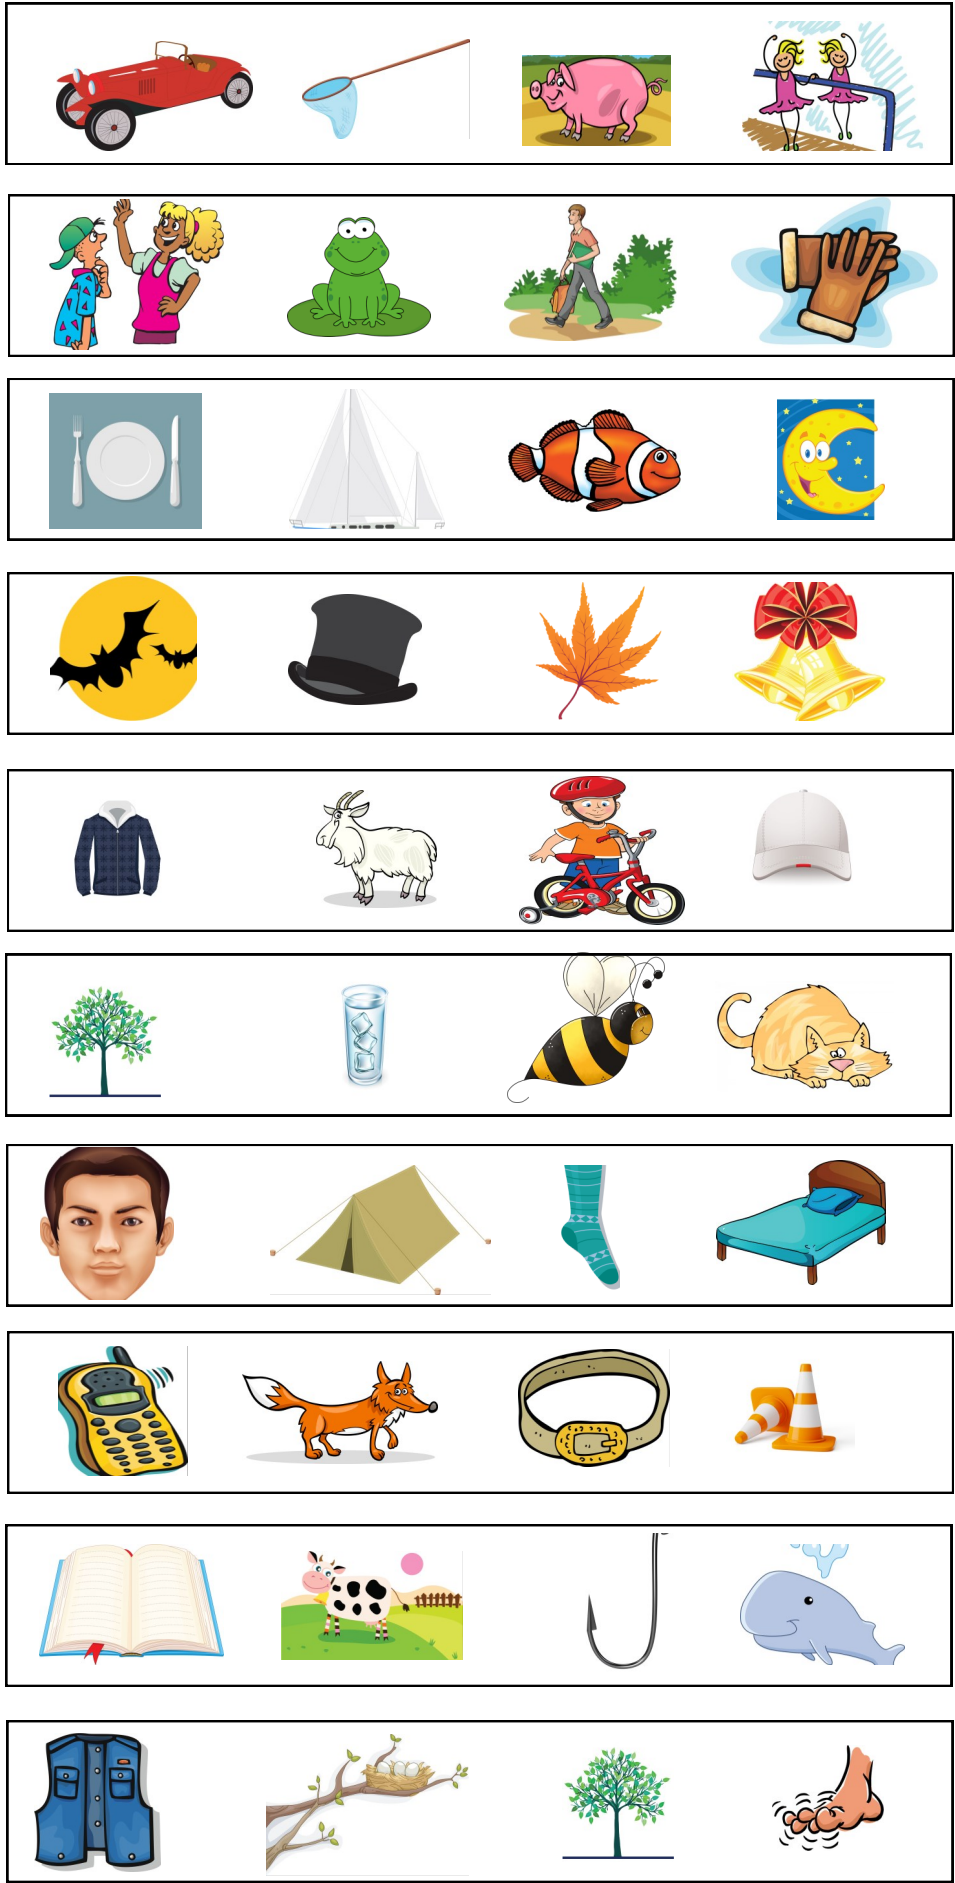



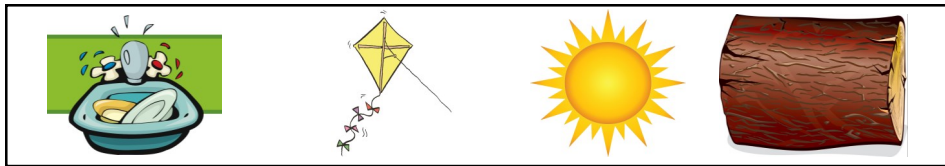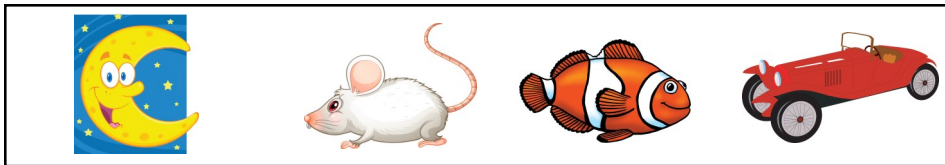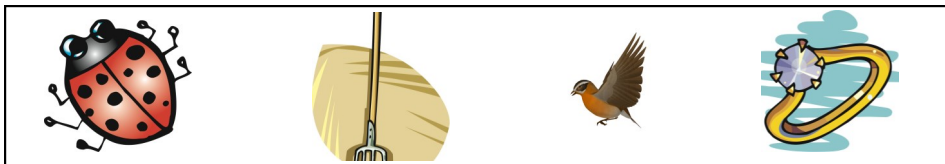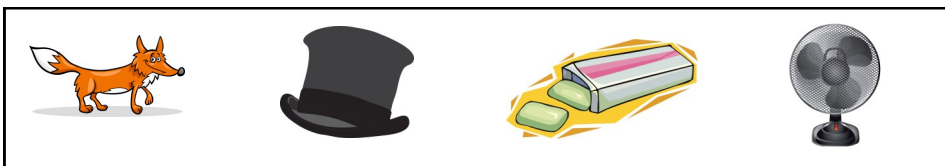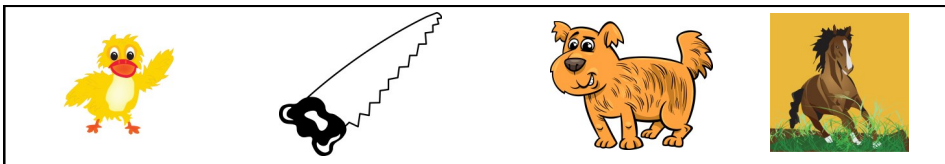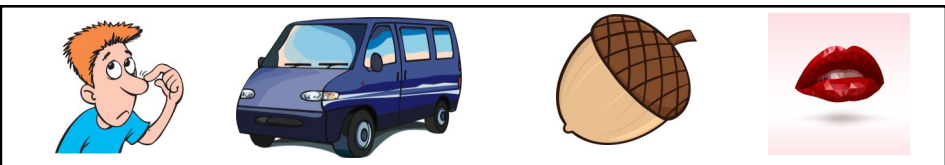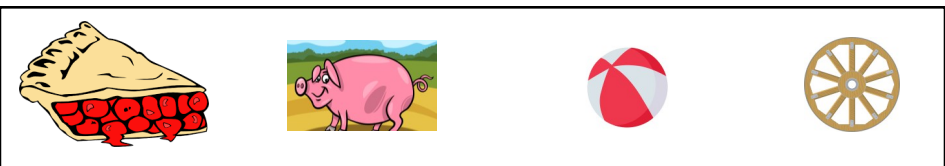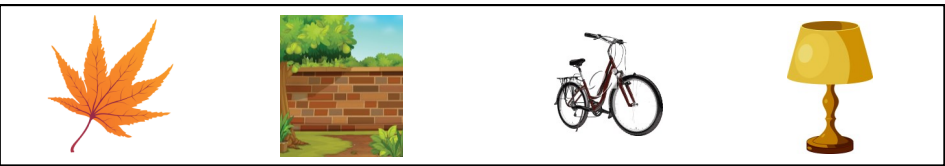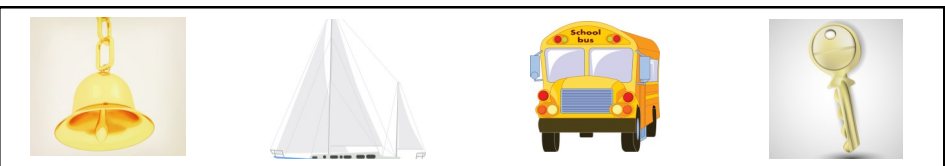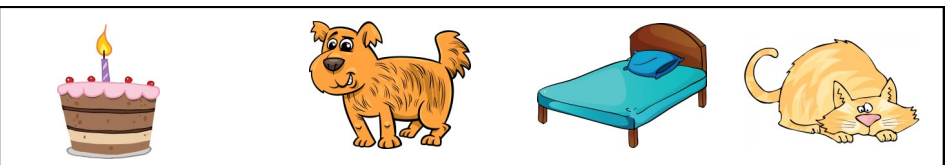

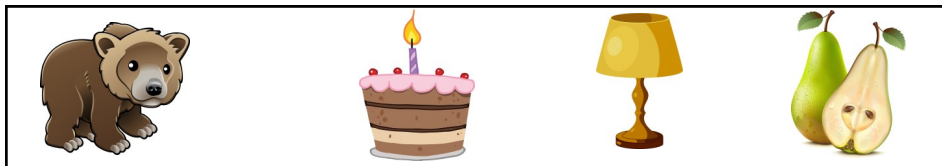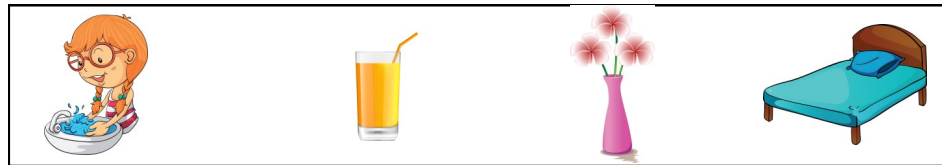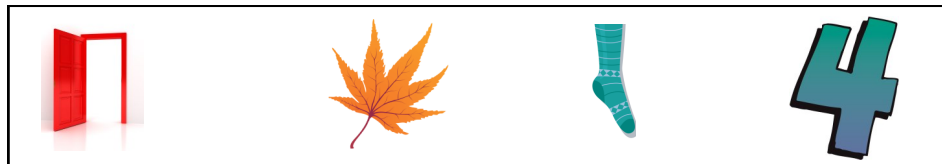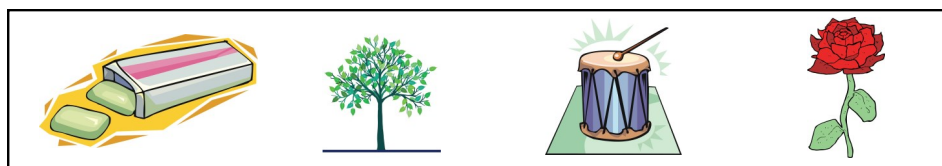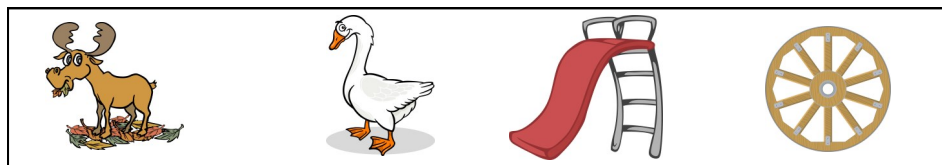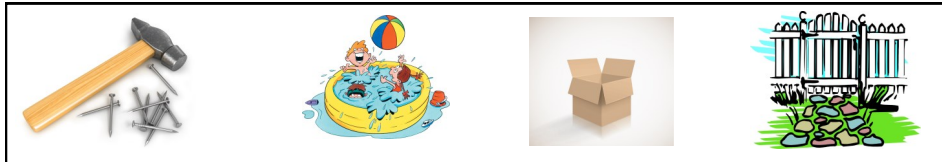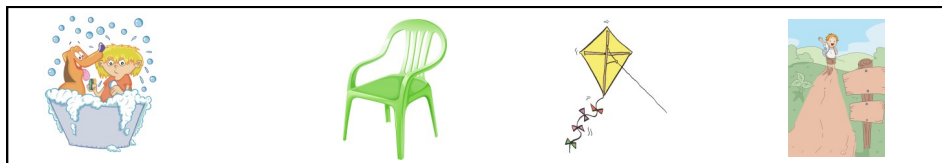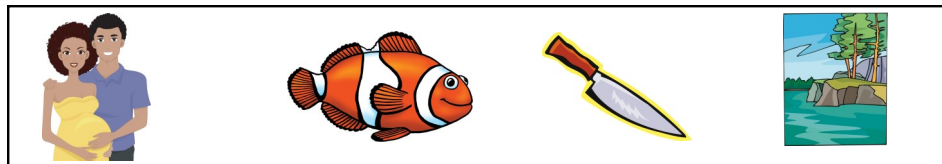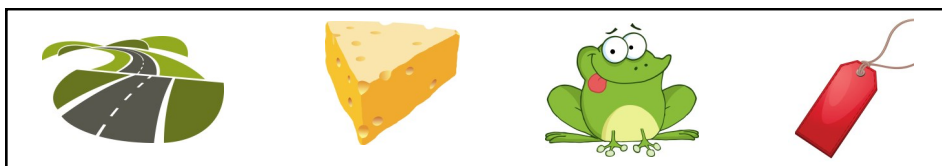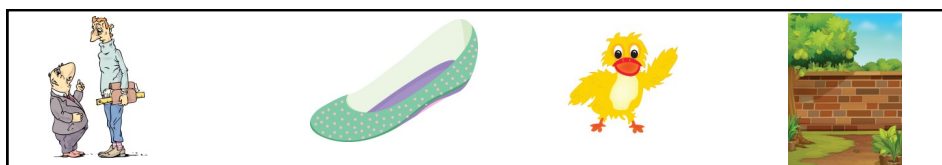

Rhyme D

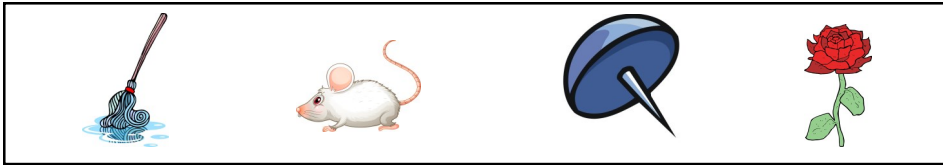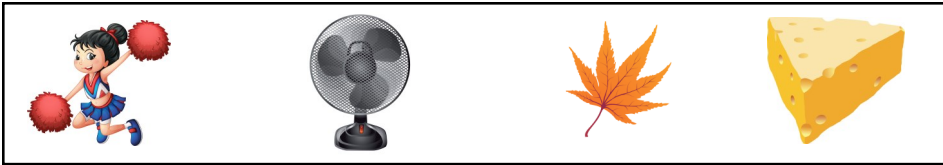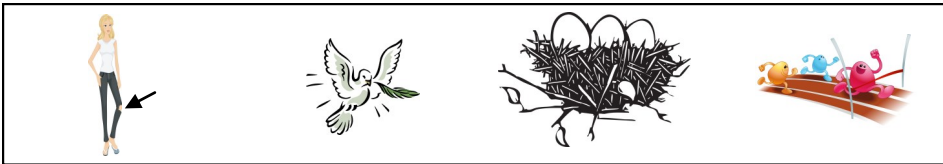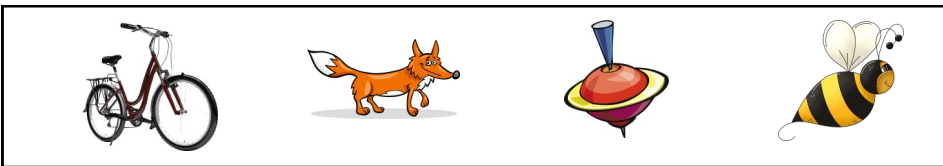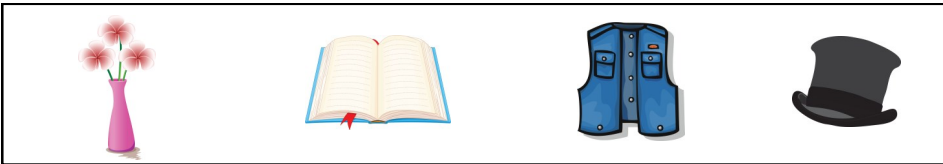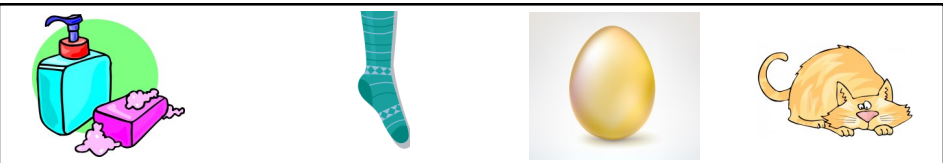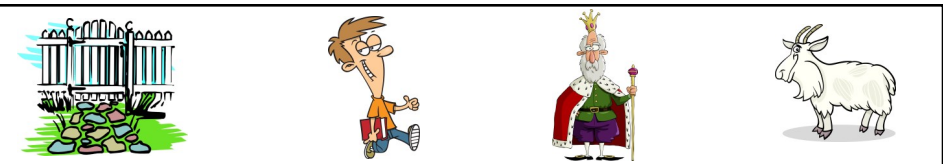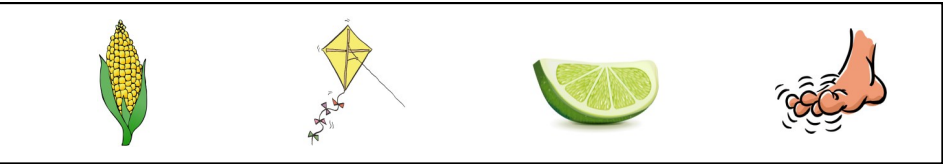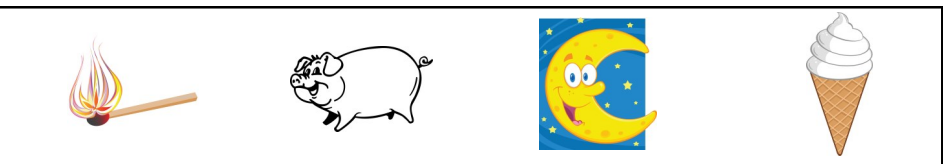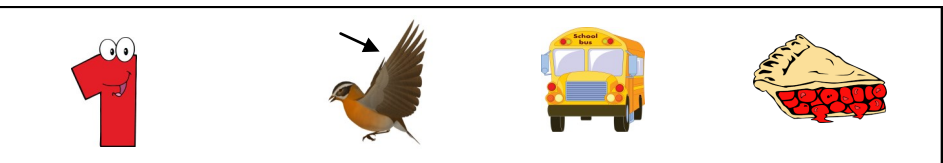

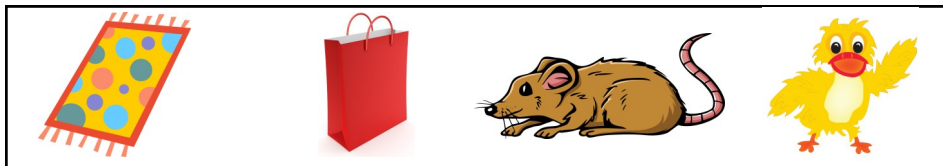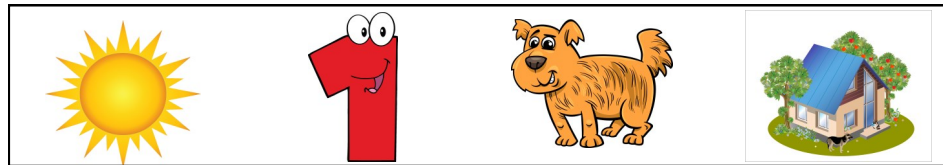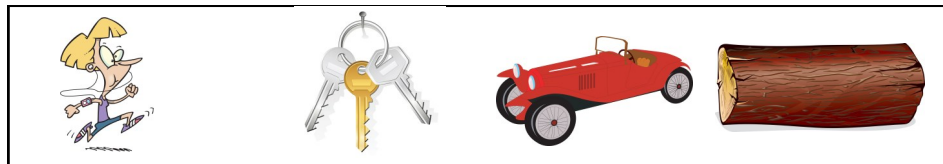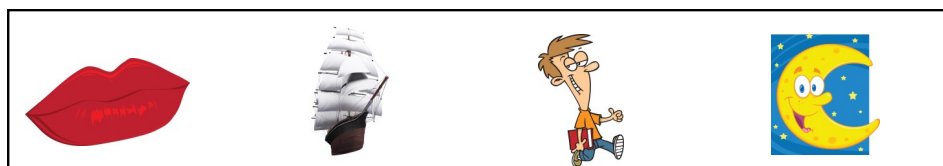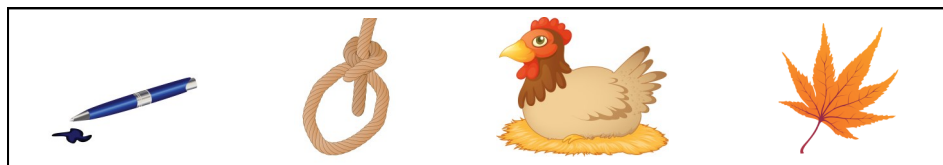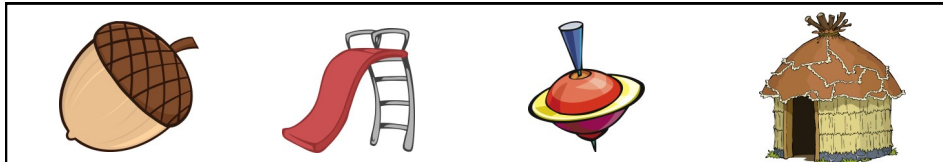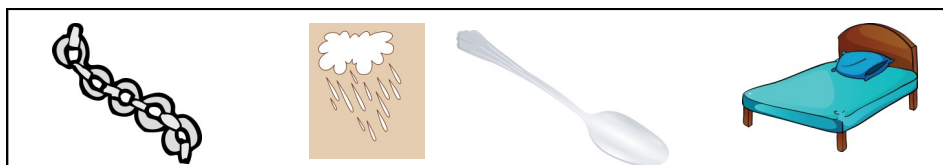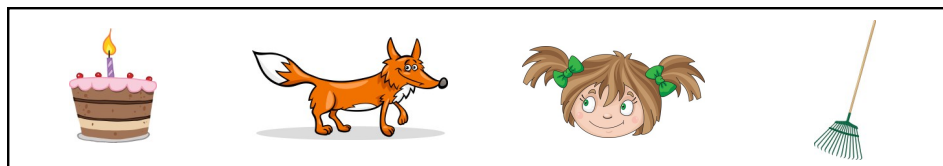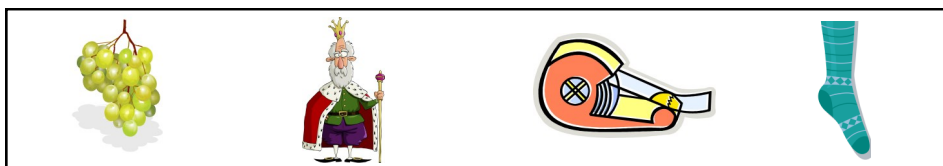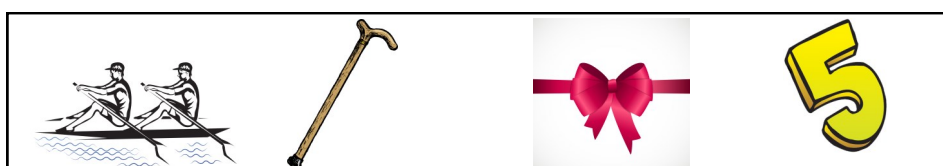

Rhyme E



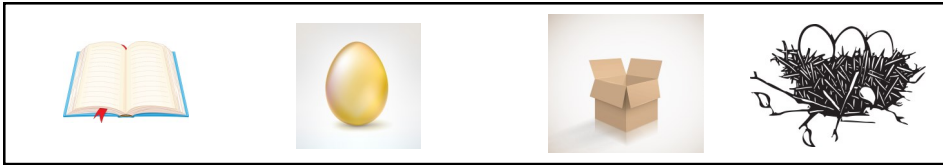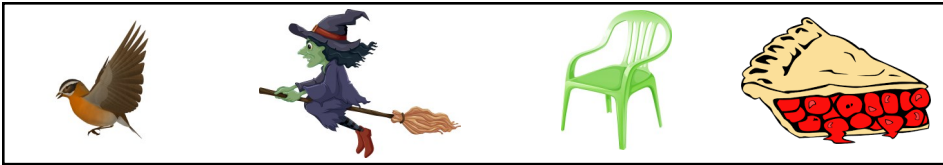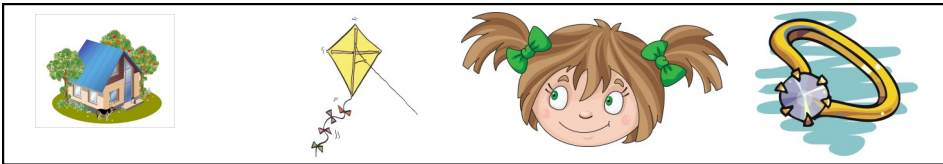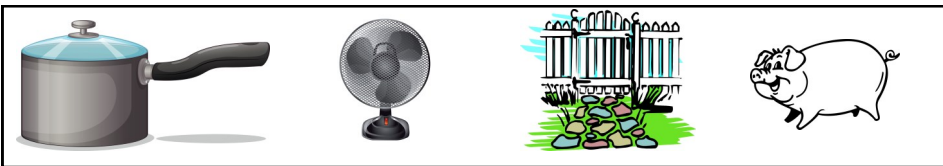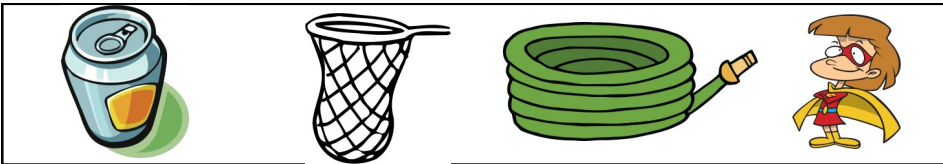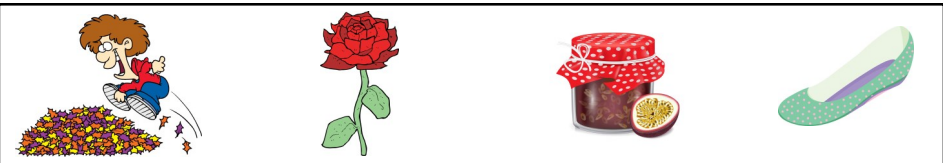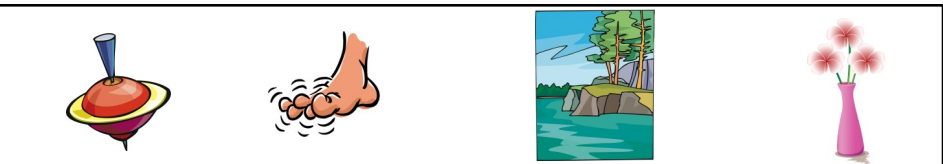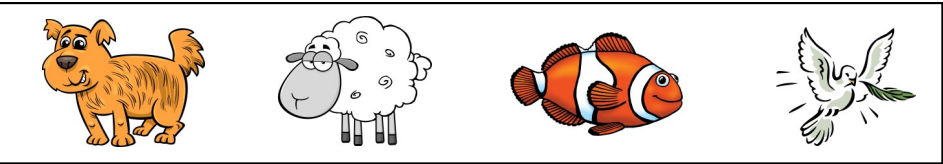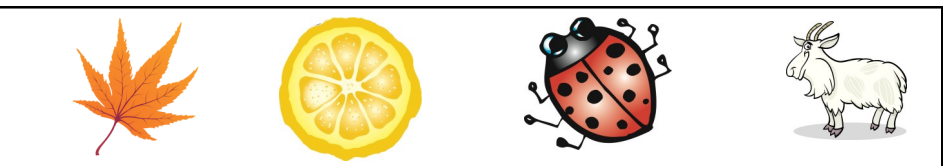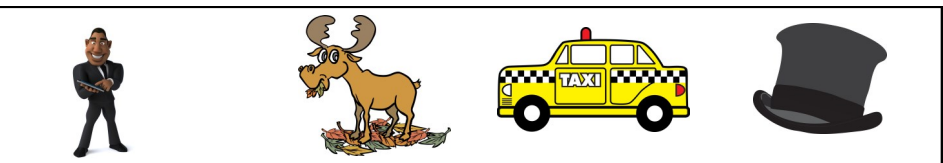

Supplement: Supplementary file 3 [file 1]
