# Supplementary material
Source: publisher figshare collection journal article supplement (https://asha.figshare.com/articles/dataset/_/21998153)

Supplemental Material S4.

# Rapid Naming Assessment Forms

# Rapid Naming

## Form A

Based on Catts (1993)

Show child example page. Say: *What [objects/animals] do you see on this page?*

*You will be saying the names of some [objects/animals] as fast as you can. When I say go, start here and name this row before you go on to the next row. Name the [objects/animals] in each row as fast as you can until you get to the end. Try not to skip any [objects/animals]. Go.*

Instructions: Start timer as soon as you say go. Stop timer when child finishes saying last word. Record time to 2 decimals. Score is invalid if more than 2 errors (excluding self corrections).

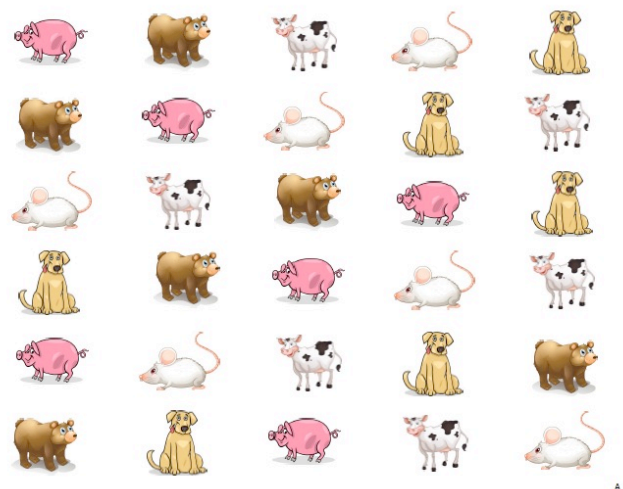

Rapid Animal Naming

Errors \_\_\_\_\_

Time \_\_\_\_\_

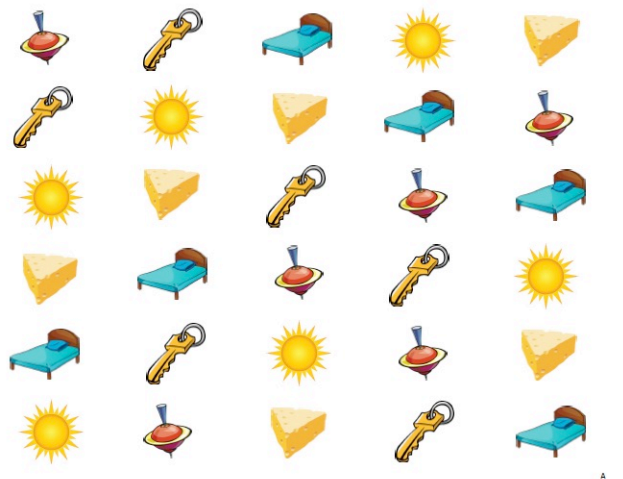

Rapid Object Naming

Errors \_\_\_\_\_

Time \_\_\_\_\_

# Rapid Naming

## Form B

Based on Catts (1993)

Show child example page. Say: *What [objects/animals] do you see on this page?*

*You will be saying the names of some [objects/animals] as fast as you can. When I say go, start here and name this row before you go on to the next row. Name the [objects/animals] in each row as fast as you can until you get to the end. Try not to skip any [objects/animals]. Go.*

Instructions: Start timer as soon as you say go. Stop timer when child finishes saying last word. Record time to 2 decimals. Score is invalid if more than 2 errors (excluding self corrections).

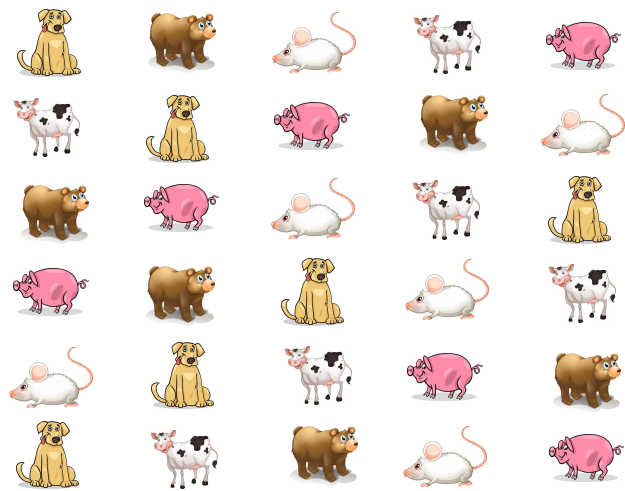

Rapid Animal Naming

Errors \_\_\_\_\_

Time \_\_\_\_\_

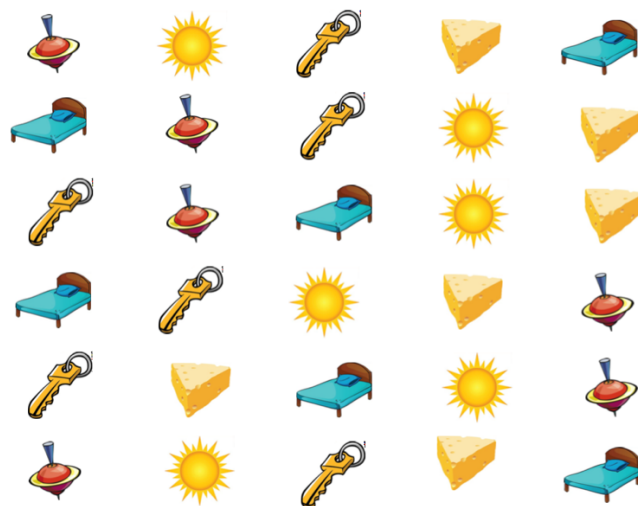

Rapid Object Naming

Errors \_\_\_\_\_

Time \_\_\_\_\_

# Rapid Naming

## Form C

Based on Catts (1993)

Show child example page. Say: *What [objects/animals] do you see on this page?*

*You will be saying the names of some [objects/animals] as fast as you can. When I say go, start here and name this row before you go on to the next row. Name the [objects/animals] in each row as fast as you can until you get to the end. Try not to skip any [objects/animals]. Go.*

Instructions: Start timer as soon as you say go. Stop timer when child finishes saying last word. Record time to 2 decimals. Score is invalid if more than 2 errors (excluding self corrections).

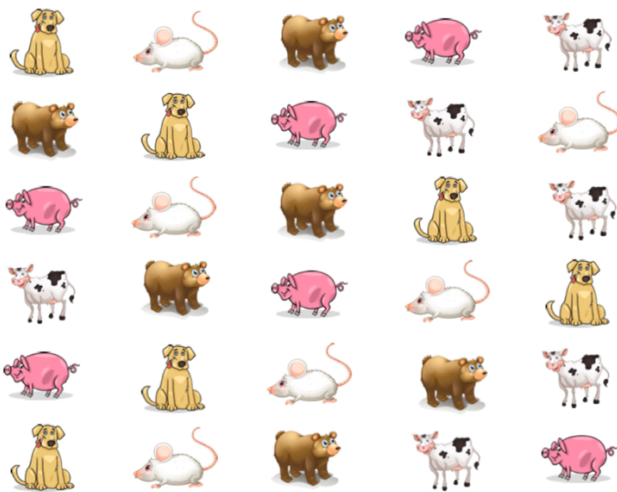

Rapid Animal Naming

Errors\_\_\_\_\_

Time \_\_\_\_\_

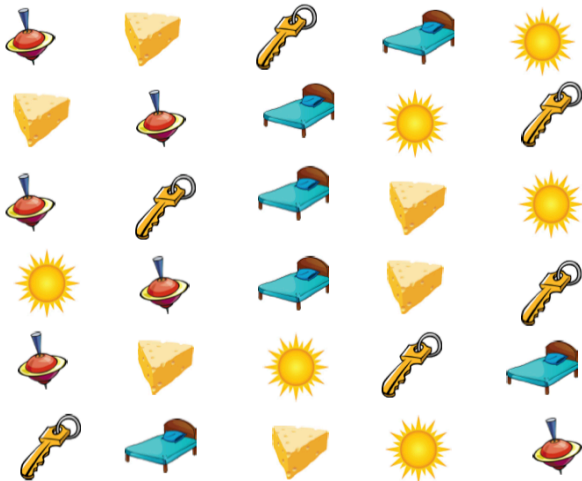

Rapid Object Naming

Errors\_\_\_\_\_

Time \_\_\_\_\_

# Rapid Naming

## Form D

Based on Catts (1993)

Show child example page. Say: *What [objects/animals] do you see on this page?*

*You will be saying the names of some [objects/animals] as fast as you can. When I say go, start here and name this row before you go on to the next row. Name the [objects/animals] in each row as fast as you can until you get to the end. Try not to skip any [objects/animals]. Go.*

Instructions: Start timer as soon as you say go. Stop timer when child finishes saying last word. Record time to 2 decimals. Score is invalid if more than 2 errors (excluding self corrections).

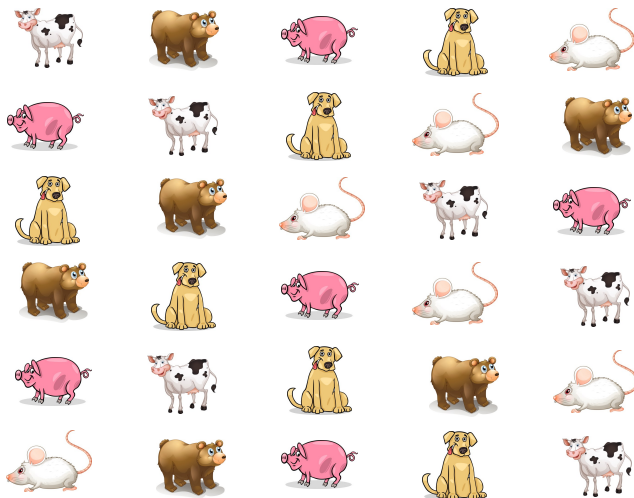

Rapid Animal Naming

Errors \_\_\_\_\_

Time \_\_\_\_\_

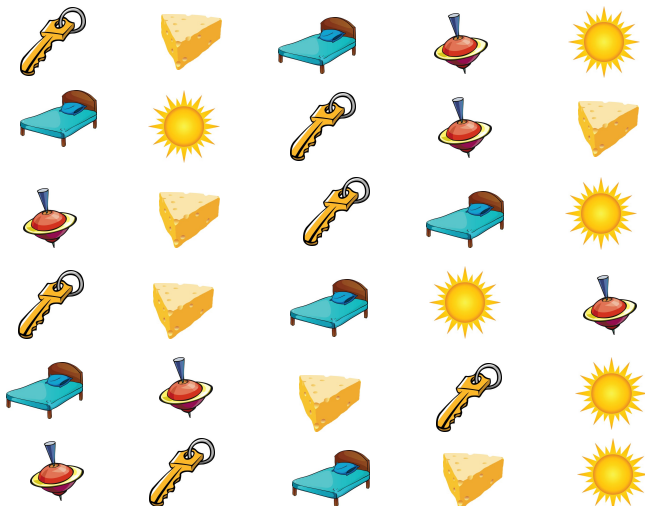

Rapid Object Naming

Errors \_\_\_\_\_

Time \_\_\_\_\_

# Rapid Naming

## Form E

Based on Catts (1993)

Show child example page. Say: *What [objects/animals] do you see on this page?*

*You will be saying the names of some [objects/animals] as fast as you can. When I say go, start here and name this row before you go on to the next row. Name the [objects/animals] in each row as fast as you can until you get to the end. Try not to skip any [objects/animals]. Go.*

Instructions: Start timer as soon as you say go. Stop timer when child finishes saying last word. Record time to 2 decimals. Score is invalid if more than 2 errors (excluding self corrections).

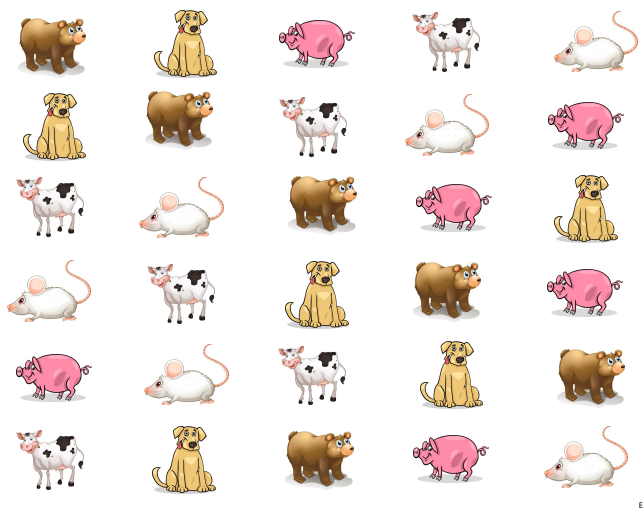

Rapid Animal Naming

Errors \_\_\_\_\_

Time \_\_\_\_\_

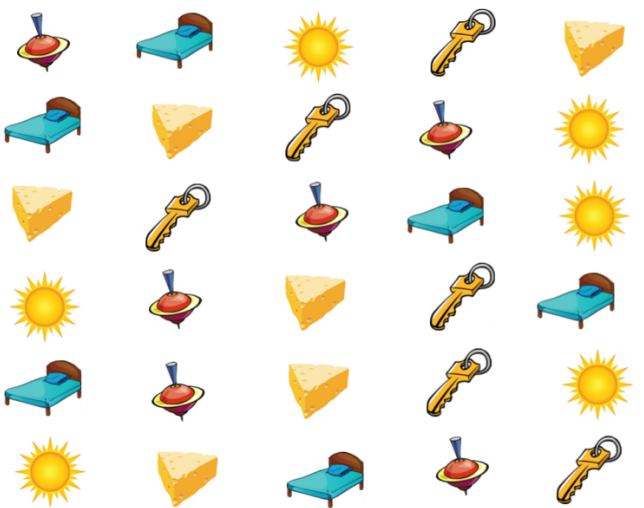

Rapid Object Naming

Errors \_\_\_\_\_

Time \_\_\_\_\_

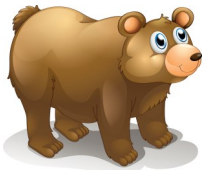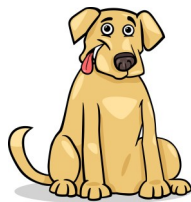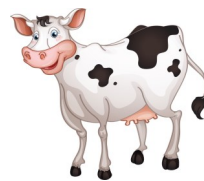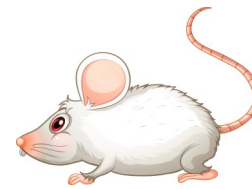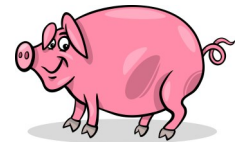

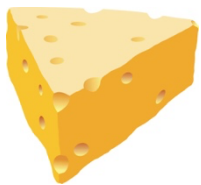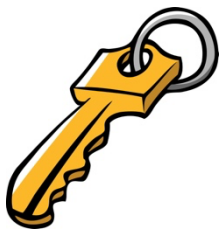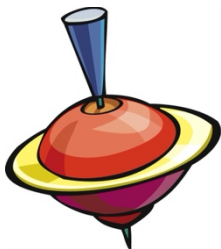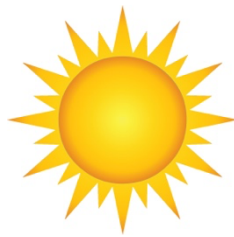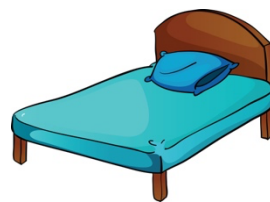



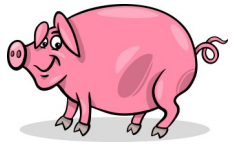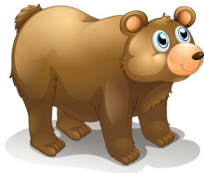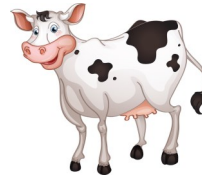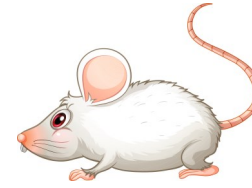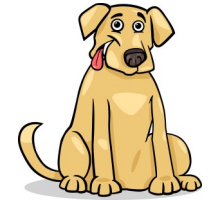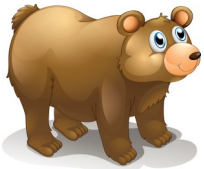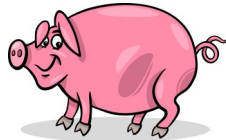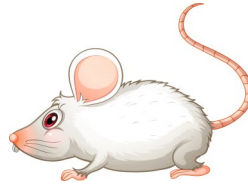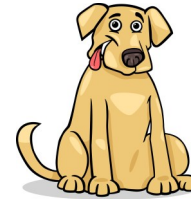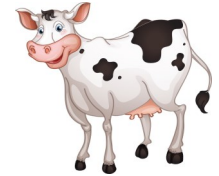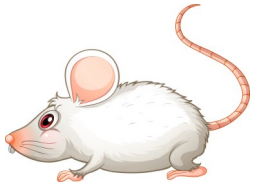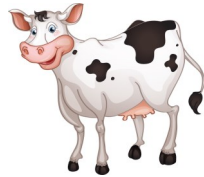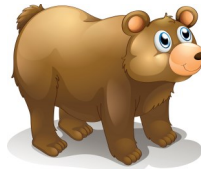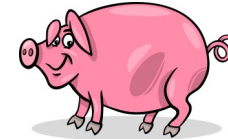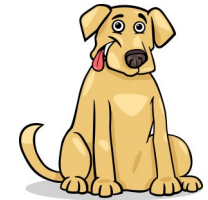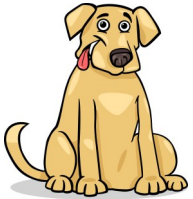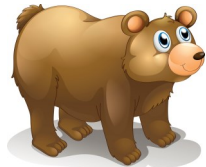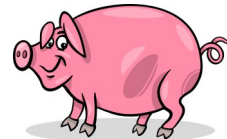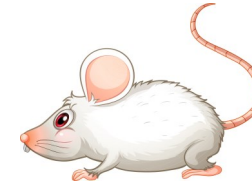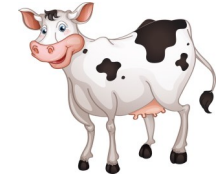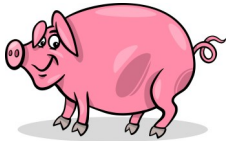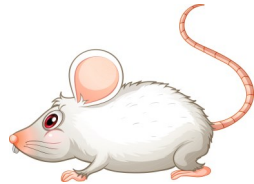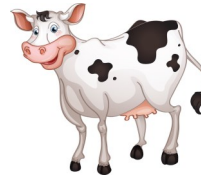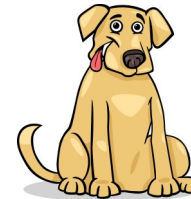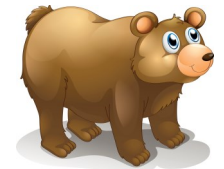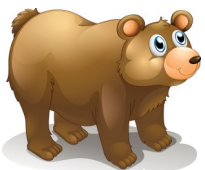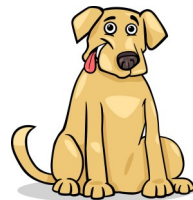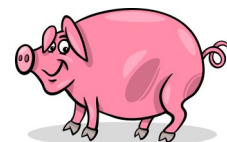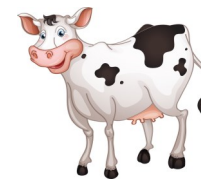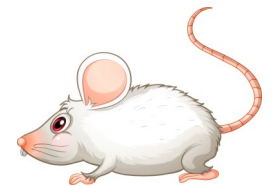

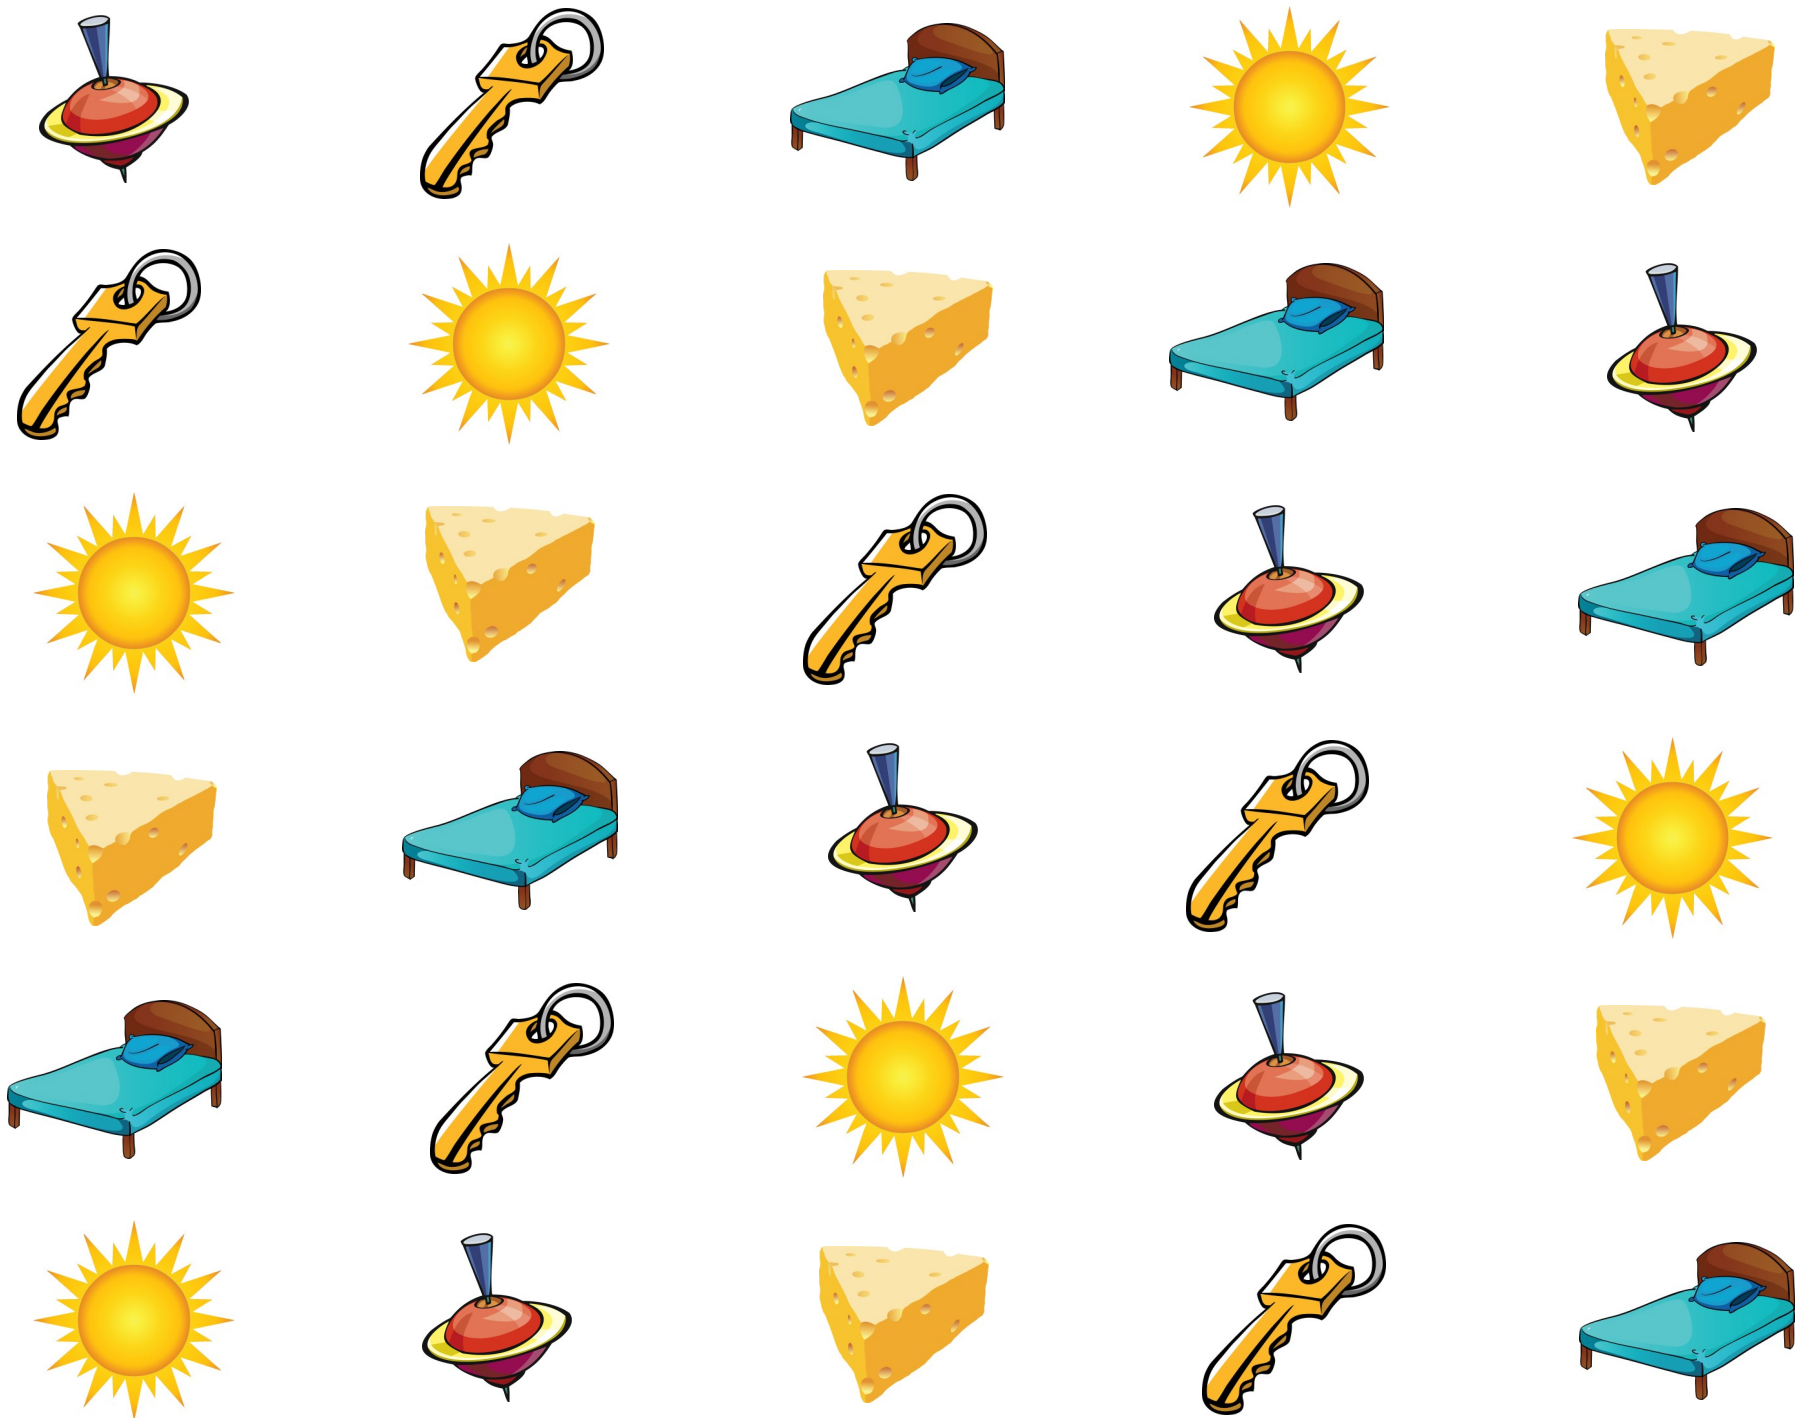

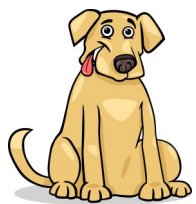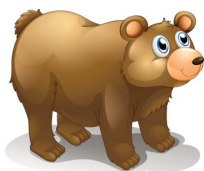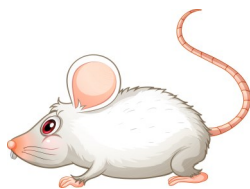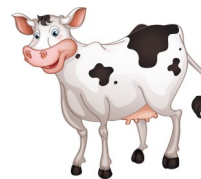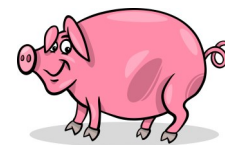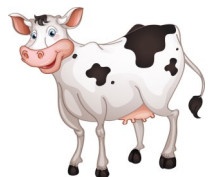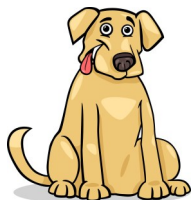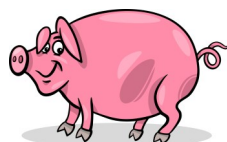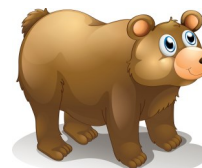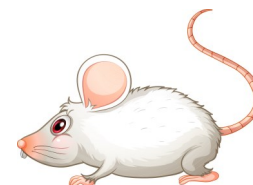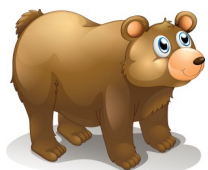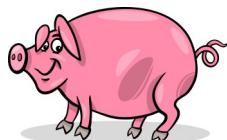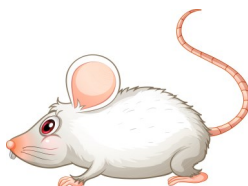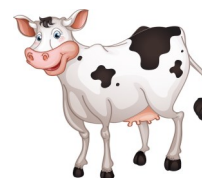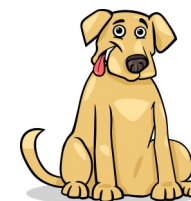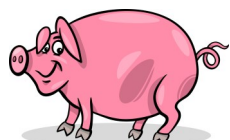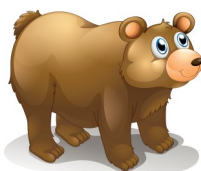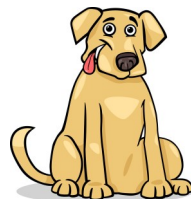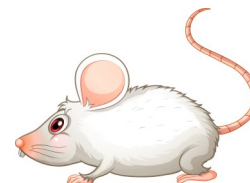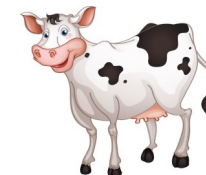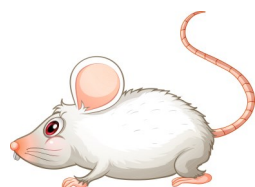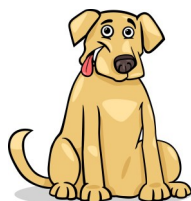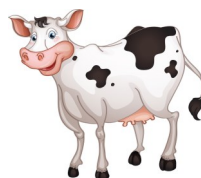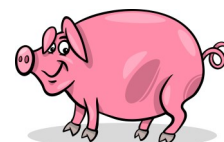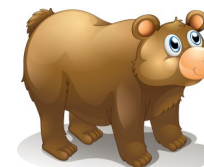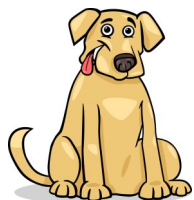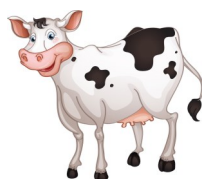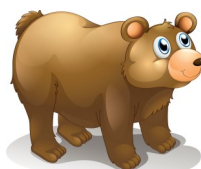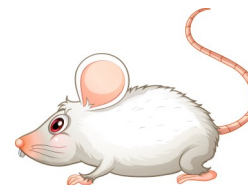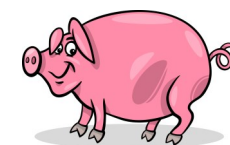



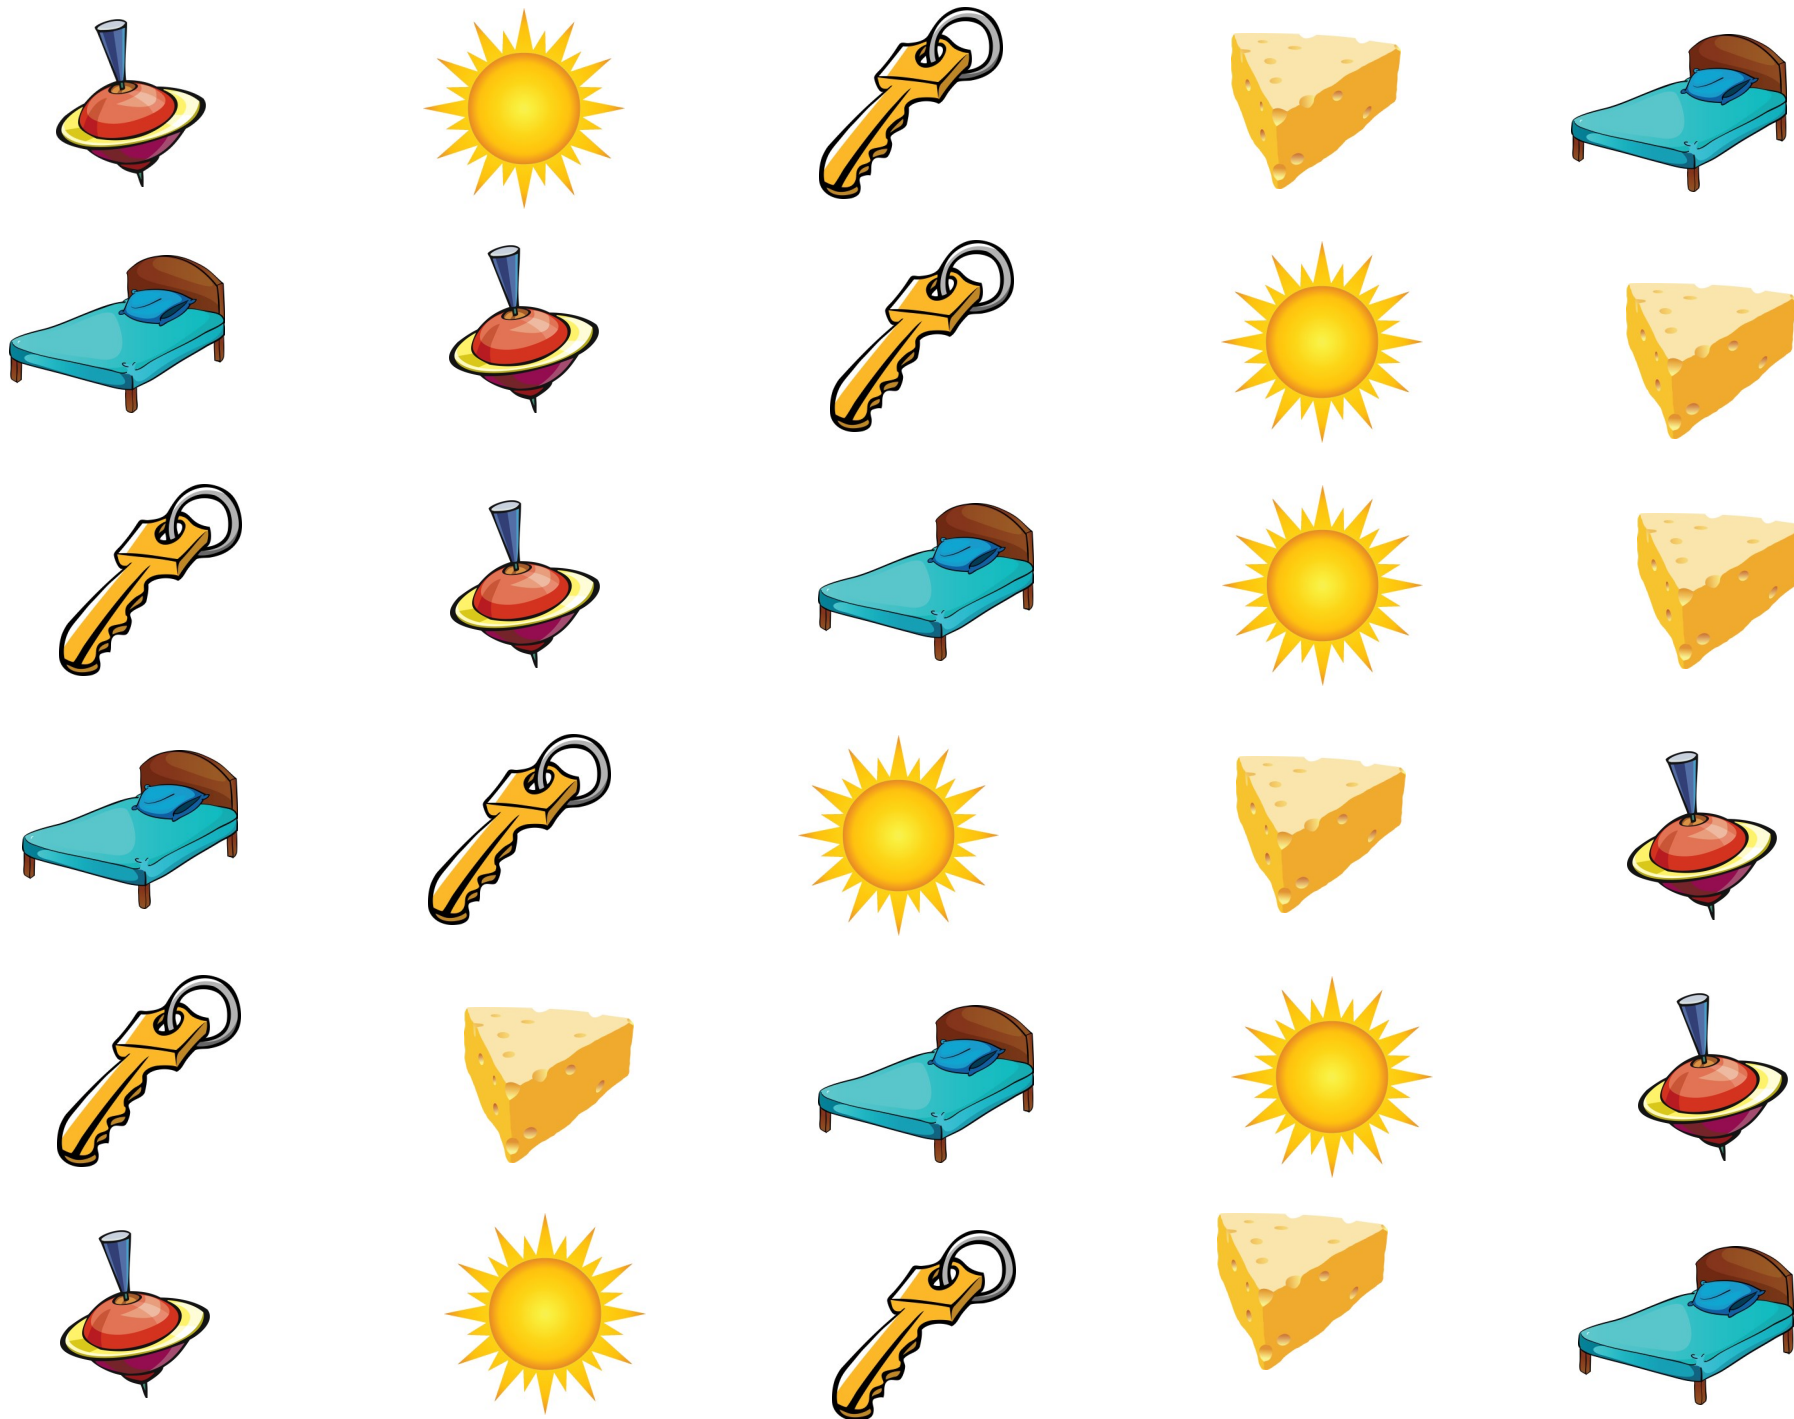

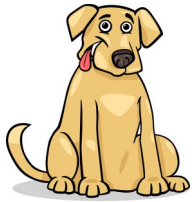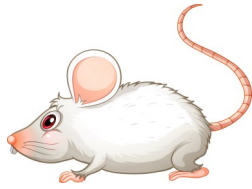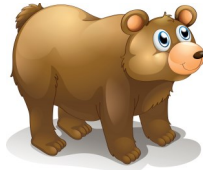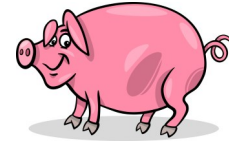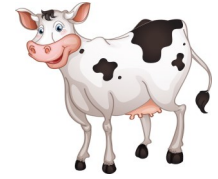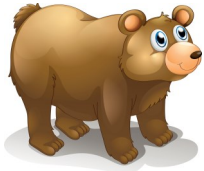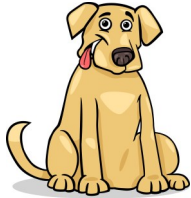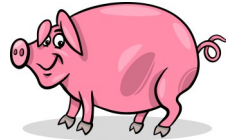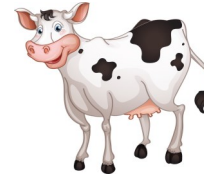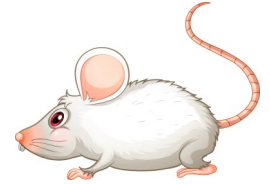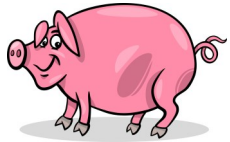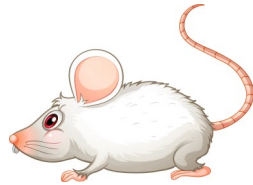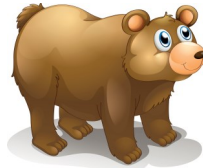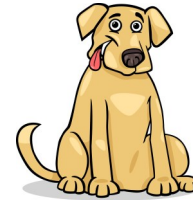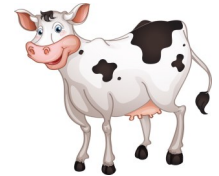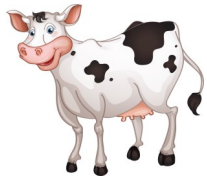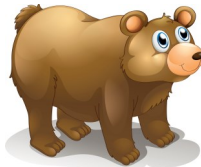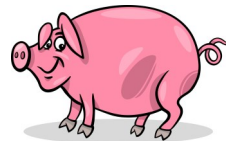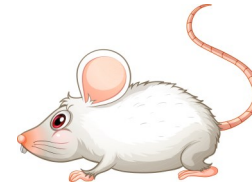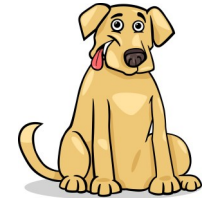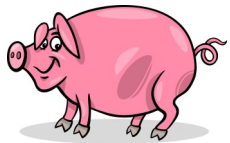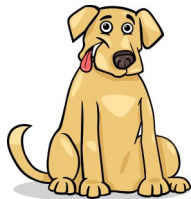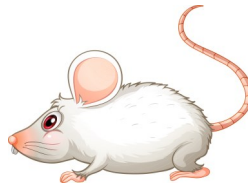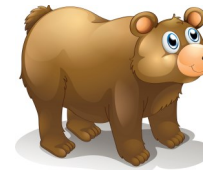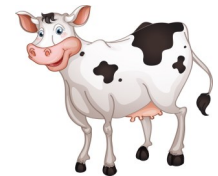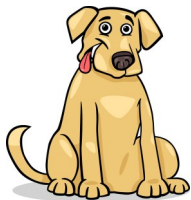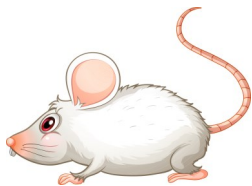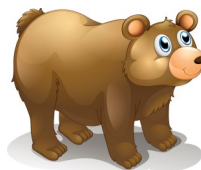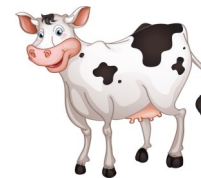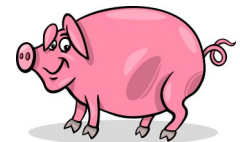

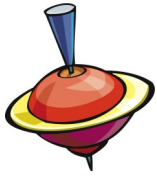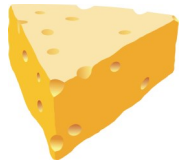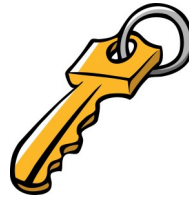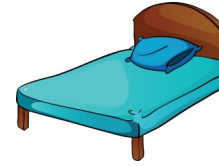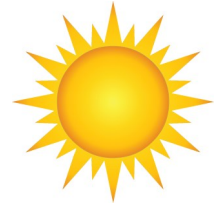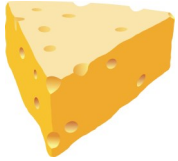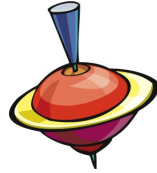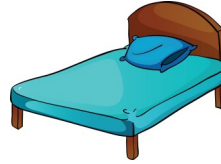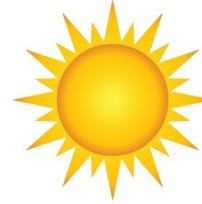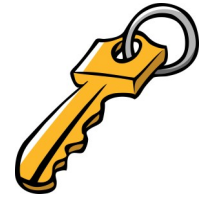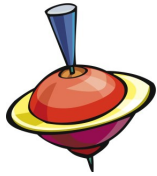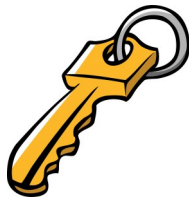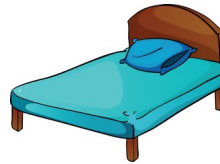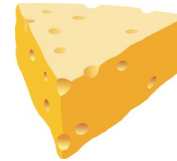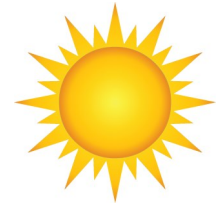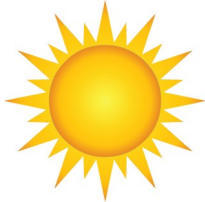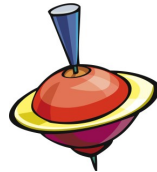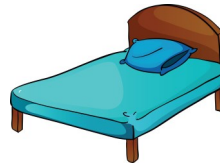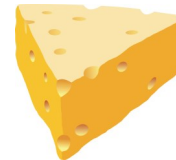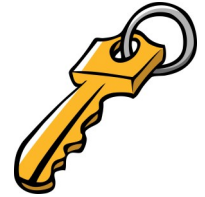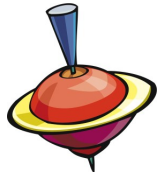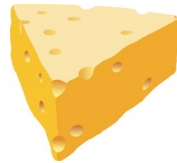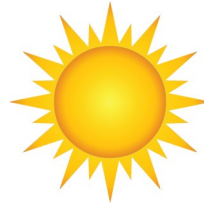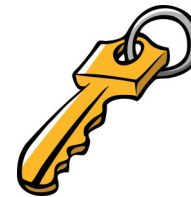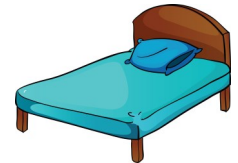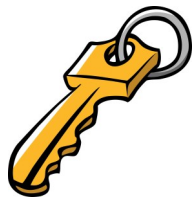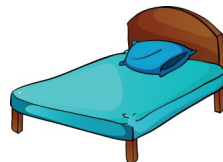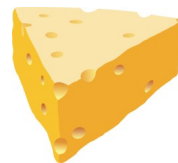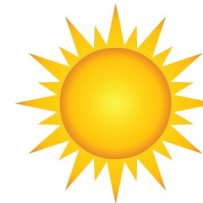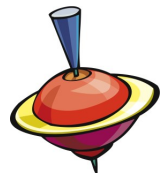



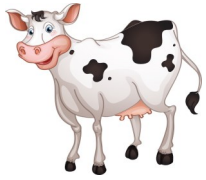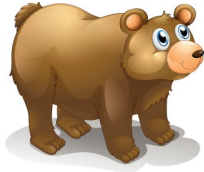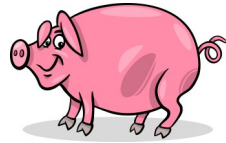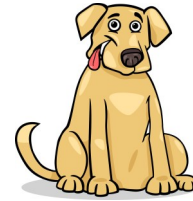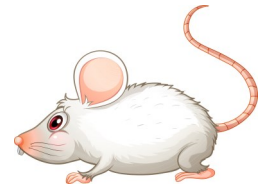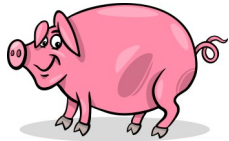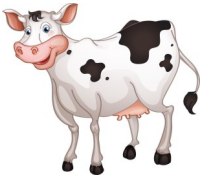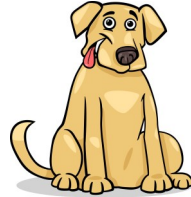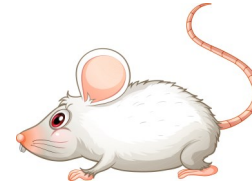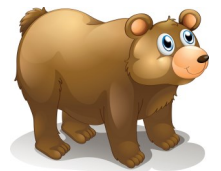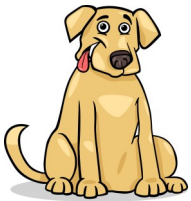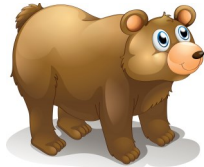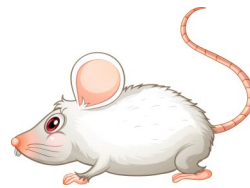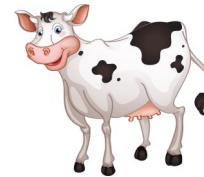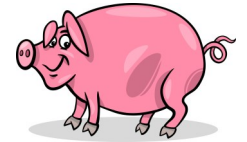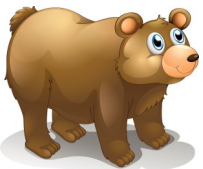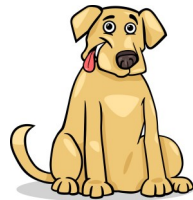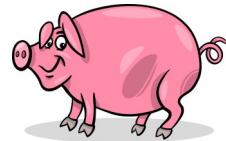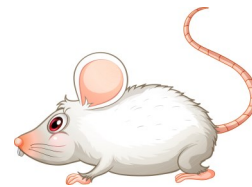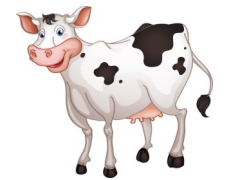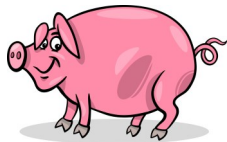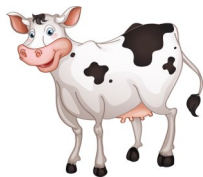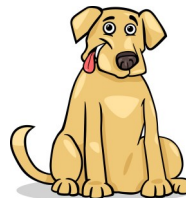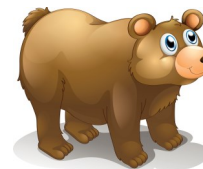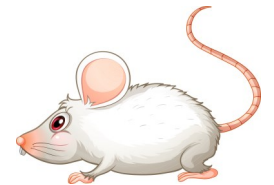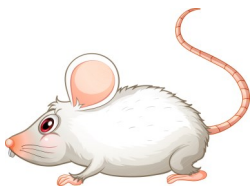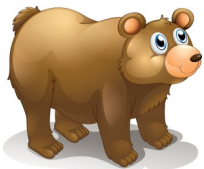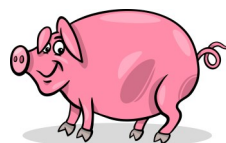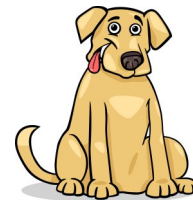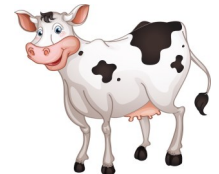

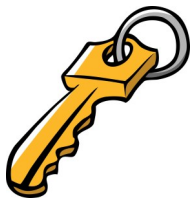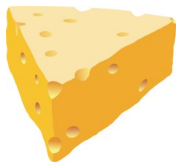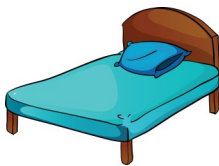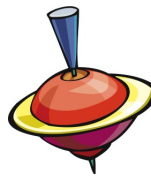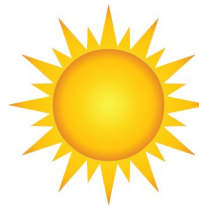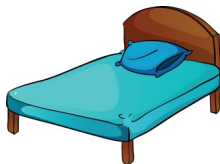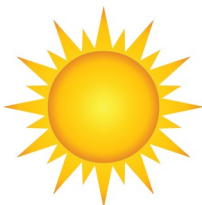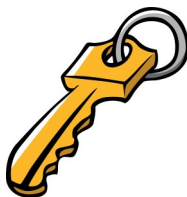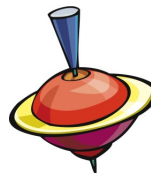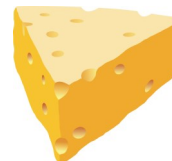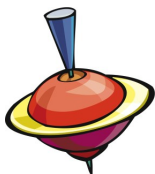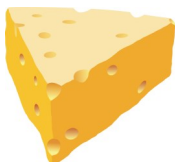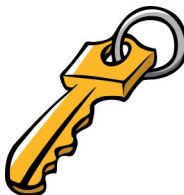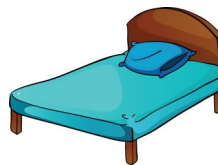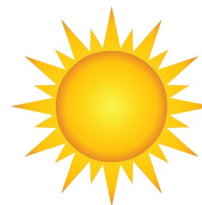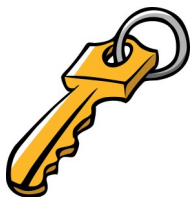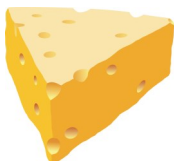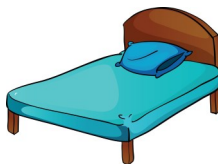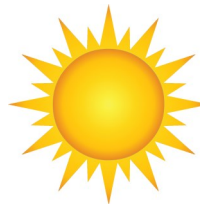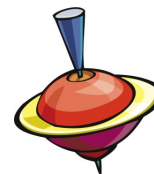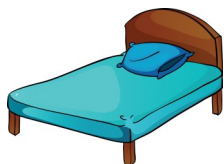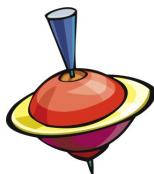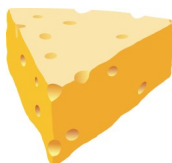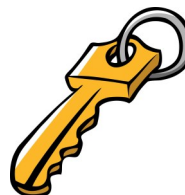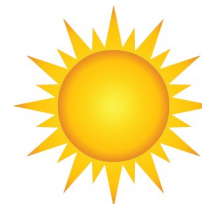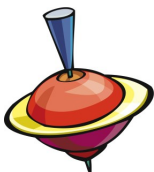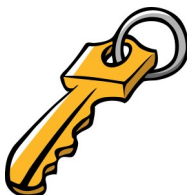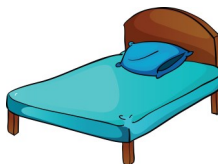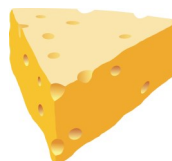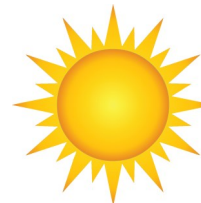



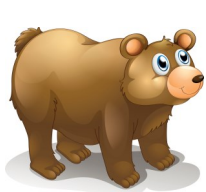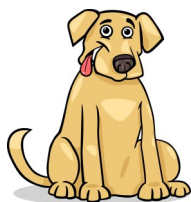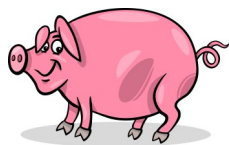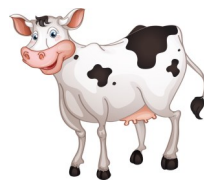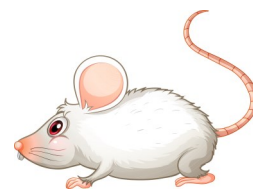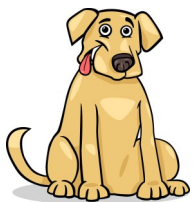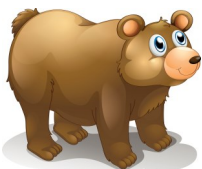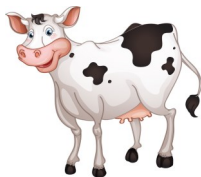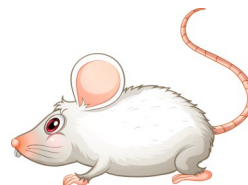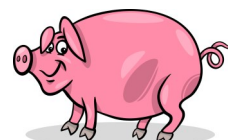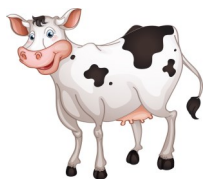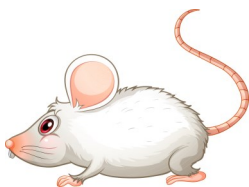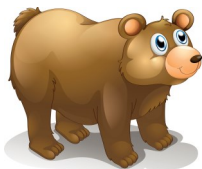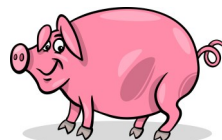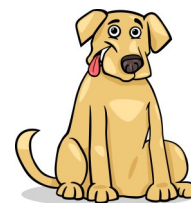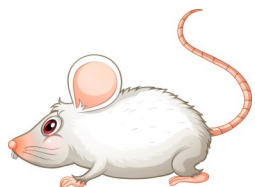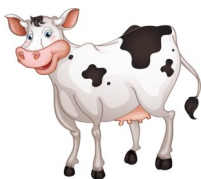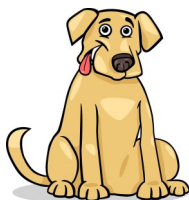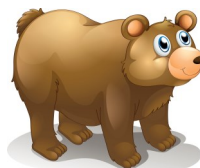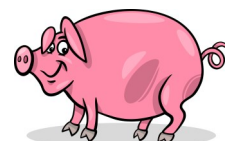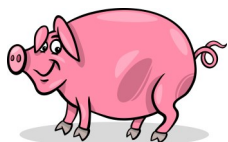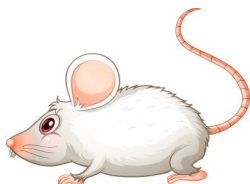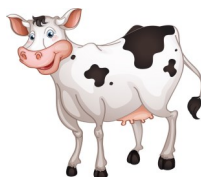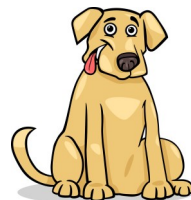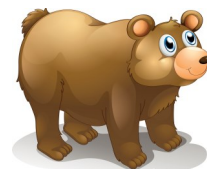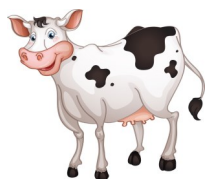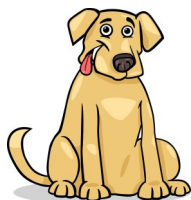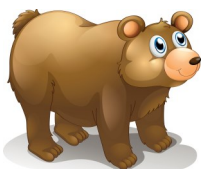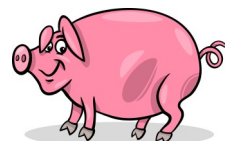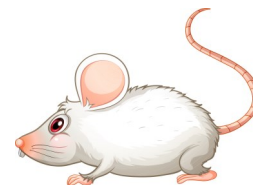

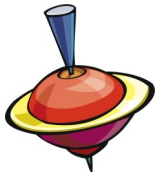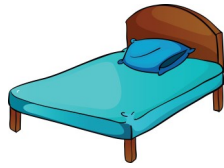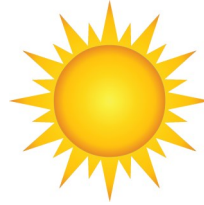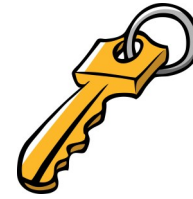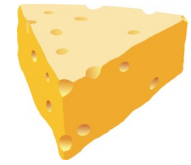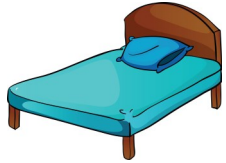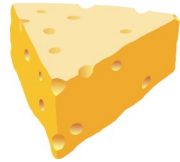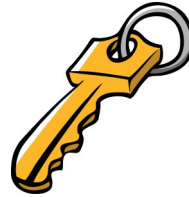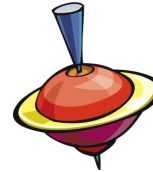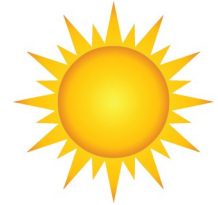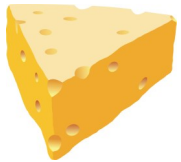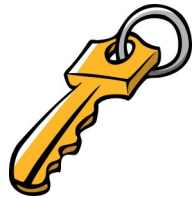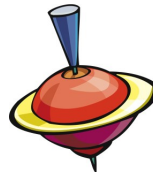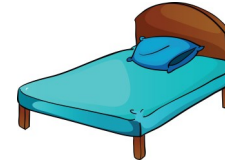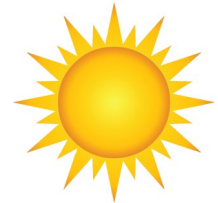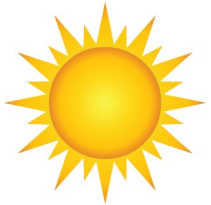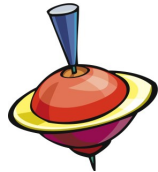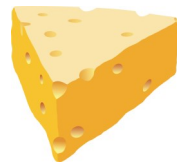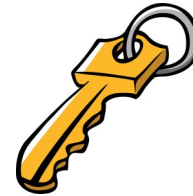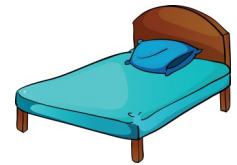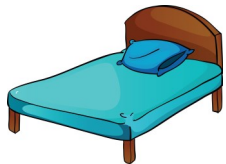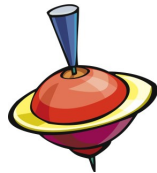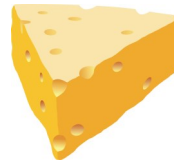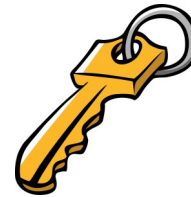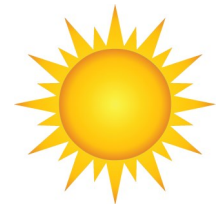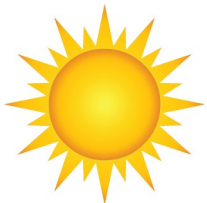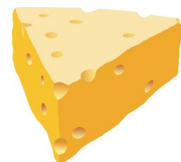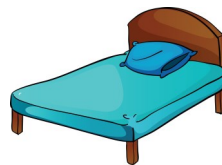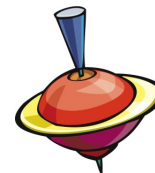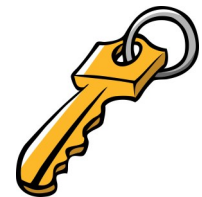

Supplement: Supplementary file 8 [file 1]
