# Supplementary material
Source: publisher figshare collection journal article supplement (https://asha.figshare.com/articles/dataset/_/21998153)
Supplement: Supplementary file 1 [file 1]

Supplemental Material S2.

# Digit Span Assessment Forms

# Digit Span

## Form A

Based on Gathercole and Adams (1993)

Say: *I am going to say some numbers. You say exactly what I say. Let's try one. 5 1.*  
[pause response]

If correct, say: *Great job! You said the numbers like I said them. Let's do some more.*  
If incorrect, say: *I want you to say the same thing I say. 5 1. Your turn.*

Instructions: Begin at 2 for all children. Children must respond correctly on two items at each digit span to pass. If first two items are correct in each group, do not administer third. Discontinue when child does not pass a length. Digit span score is the highest set a child passes.

2

\_\_\_\_ 2 9  
\_\_\_\_ 9 8  
\_\_\_\_ 5 7

Pass ☐

3

\_\_\_\_ 6 2 7  
\_\_\_\_ 8 1 5  
\_\_\_\_ 1 7 6

Pass ☐

4

\_\_\_\_ 8 1 7 2  
\_\_\_\_ 4 2 5 3  
\_\_\_\_ 7 6 8 5

Pass ☐

5

\_\_\_\_ 6 4 8 2 5  
\_\_\_\_ 8 9 2 4 1  
\_\_\_\_ 7 9 3 5 6

Pass ☐

6

\_\_\_\_ 7 5 3 4 2 9  
\_\_\_\_ 9 5 2 3 6 4  
\_\_\_\_ 8 7 4 1 2 9

Pass ☐

7

\_\_\_\_ 6 7 9 8 1 5 4  
\_\_\_\_ 4 8 1 2 5 7 6  
\_\_\_\_ 4 9 2 7 5 3 5

Pass ☐

8

\_\_\_\_ 2 4 6 3 8 1 5 9  
\_\_\_\_ 3 9 1 7 6 5 2 8  
\_\_\_\_ 1 4 9 3 2 5 8 7

Pass ☐

9

\_\_\_\_ 8 9 1 4 2 5 3 7 6  
\_\_\_\_ 7 1 5 6 2 8 3 9 4  
\_\_\_\_ 1 7 5 9 3 6 2 8 4

Pass ☐

Digit Span \_\_\_\_\_

# Digit Span

## Form B

Based on Gathercole and Adams (1993)

Say: *I am going to say some numbers. You say exactly what I say. Let's try one. 5 1.*  
[pause response]

If correct, say: *Great job! You said the numbers like I said them. Let's do some more.*  
If incorrect, say: *I want you to say the same thing I say. 5 1. Your turn.*

Instructions: Begin at 2 for all children. Children must respond correctly on two items at each digit span to pass. If first two items are correct in each group, do not administer third. Discontinue when child does not pass a length. Digit span score is the highest set a child passes.

2  
\_\_\_\_ 9 4  
\_\_\_\_ 8 1  
\_\_\_\_ 6 8

Pass ☐

3  
\_\_\_\_ 4 5 3  
\_\_\_\_ 8 7 9  
\_\_\_\_ 5 6 3

Pass ☐

4  
\_\_\_\_ 8 1 4 2  
\_\_\_\_ 1 6 3 5  
\_\_\_\_ 7 2 4 6

Pass ☐

5  
\_\_\_\_ 3 9 4 5 1  
\_\_\_\_ 4 8 3 1 5  
\_\_\_\_ 5 3 6 9 1

Pass ☐

6  
\_\_\_\_ 3 5 4 1 2 6  
\_\_\_\_ 1 6 5 4 3 7  
\_\_\_\_ 6 1 5 7 3 8

Pass ☐

7  
\_\_\_\_ 4 9 2 6 8 3 1  
\_\_\_\_ 7 4 6 8 9 2 5  
\_\_\_\_ 8 2 3 9 5 7 6

Pass ☐

8  
\_\_\_\_ 4 6 2 7 9 3 5 1  
\_\_\_\_ 7 3 2 6 1 4 5 9  
\_\_\_\_ 4 3 1 7 2 6 8 5

Pass ☐

9  
\_\_\_\_ 3 8 1 4 9 6 5 7 2  
\_\_\_\_ 5 3 7 2 6 9 4 1 8  
\_\_\_\_ 4 8 3 2 7 5 9 1 6

Pass ☐

Digit Span \_\_\_\_\_

# Digit Span

## Form C

Based on Gathercole and Adams (1993)

Say: *I am going to say some numbers. You say exactly what I say. Let's try one. 5 1.*  
[pause response]

If correct, say: *Great job! You said the numbers like I said them. Let's do some more.*  
If incorrect, say: *I want you to say the same thing I say. 5 1. Your turn.*

Instructions: Begin at 2 for all children. Children must respond correctly on two items at each digit span to pass. If first two items are correct in each group, do not administer third. Discontinue when child does not pass a length. Digit span score is the highest set a child passes.

2

\_\_\_ 4 8

\_\_\_ 6 3

\_\_\_ 2 8

Pass \_\_\_

3

\_\_\_ 8 6 9

\_\_\_ 1 3 2

\_\_\_ 3 7 5

Pass \_\_\_

4

\_\_\_ 7 4 6 3

\_\_\_ 4 2 3 7

\_\_\_ 2 9 5 3

Pass \_\_\_

5

\_\_\_ 9 3 7 2 5

\_\_\_ 5 3 1 4 6

\_\_\_ 6 7 5 3 1

Pass \_\_\_

6

\_\_\_ 7 6 1 3 5 8

\_\_\_ 6 4 7 5 1 9

\_\_\_ 4 1 3 6 5 2

Pass \_\_\_

7

\_\_\_ 4 9 8 5 1 6 3

\_\_\_ 1 4 5 7 6 2 8

\_\_\_ 7 9 6 2 1 8 4

Pass \_\_\_

8

\_\_\_ 4 8 5 9 1 6 3 7

\_\_\_ 6 3 5 9 1 2 4 8

\_\_\_ 8 7 6 3 4 2 9 5

Pass \_\_\_

9

\_\_\_ 5 3 2 1 4 8 6 7 9

\_\_\_ 4 2 6 9 1 8 5 3 7

\_\_\_ 5 8 4 1 3 2 6 9 7

Pass \_\_\_

Digit Span \_\_\_\_\_

# Digit Span

## Form D

Based on Gathercole and Adams (1993)

Say: *I am going to say some numbers. You say exactly what I say. Let's try one. 5 1.*  
[pause response]

If correct, say: *Great job! You said the numbers like I said them. Let's do some more.*  
If incorrect, say: *I want you to say the same thing I say. 5 1. Your turn.*

Instructions: Begin at 2 for all children. Children must respond correctly on two items at each digit span to pass. If first two items are correct in each group, do not administer third. Discontinue when child does not pass a length. Digit span score is the highest set a child passes.

|                     |                       |                   |
|---------------------|-----------------------|-------------------|
| 2                   | 3                     | 4                 |
| ___ 4 9             | ___ 2 4 6             | ___ 9 2 8 4       |
| ___ 3 2             | ___ 8 4 1             | ___ 8 3 5 4       |
| ___ 6 1             | ___ 6 2 3             | ___ 7 6 1 3       |
| Pass _____          | Pass _____            | Pass _____        |
| 5                   | 6                     | 7                 |
| ___ 4 2 8 1 5       | ___ 6 9 8 1 4 7       | ___ 8 6 2 7 9 3 4 |
| ___ 8 9 7 5 3       | ___ 1 3 8 2 4 6       | ___ 2 4 9 7 8 6 5 |
| ___ 1 4 9 2 3       | ___ 2 9 8 1 6 4       | ___ 7 5 8 4 1 9 3 |
| Pass _____          | Pass _____            | Pass _____        |
| 8                   | 9                     |                   |
| ___ 1 9 2 8 6 3 4 7 | ___ 7 2 3 8 4 1 5 6 9 |                   |
| ___ 7 3 8 5 2 4 6 1 | ___ 8 2 3 4 6 9 5 7 1 |                   |
| ___ 6 5 3 1 2 4 8 7 | ___ 6 2 8 4 5 1 7 9 3 |                   |
| Pass _____          | Pass _____            | Digit Span _____  |

# Digit Span

## Form E

Based on Gathercole and Adams (1993)

Say: *I am going to say some numbers. You say exactly what I say. Let's try one. 5 1.*  
[pause response]

If correct, say: *Great job! You said the numbers like I said them. Let's do some more.*  
If incorrect, say: *I want you to say the same thing I say. 5 1. Your turn.*

Instructions: Begin at 2 for all children. Children must respond correctly on two items at each digit span to pass. If first two items are correct in each group, do not administer third. Discontinue when child does not pass a length. Digit span score is the highest set a child passes.

2

\_\_\_ 4 9

\_\_\_ 9 3

\_\_\_ 2 5

Pass ☐

3

\_\_\_ 3 8 4

\_\_\_ 9 2 6

\_\_\_ 1 7 9

Pass ☐

4

\_\_\_ 4 6 2 1

\_\_\_ 9 7 6 8

\_\_\_ 8 1 9 5

Pass ☐

5

\_\_\_ 8 2 6 3 4

\_\_\_ 8 4 6 1 5

\_\_\_ 4 5 1 7 8

Pass ☐

6

\_\_\_ 1 2 8 3 6 9

\_\_\_ 8 1 7 2 5 3

\_\_\_ 7 5 2 8 4 3

Pass ☐

7

\_\_\_ 1 9 8 2 4 7 5

\_\_\_ 6 8 7 4 2 1 5

\_\_\_ 9 6 3 1 5 8 7

Pass ☐

8

\_\_\_ 3 7 8 5 9 6 1 4

\_\_\_ 7 8 9 5 1 3 2 6

\_\_\_ 9 6 5 7 4 2 1 3

Pass ☐

9

\_\_\_ 1 8 5 4 3 9 2 6 7

\_\_\_ 9 5 6 8 2 4 7 3 1

\_\_\_ 3 8 4 2 6 7 1 5 9

Pass ☐

Digit Span \_\_\_\_\_
