# Supplementary material
Source: publisher figshare collection journal article supplement (https://asha.figshare.com/articles/dataset/_/21998153)
Supplement: Supplementary file 2 [file 1]

**Supplemental Material S7.** Sensitivity analyses: print knowledge growth models including nonverbal IQ and maternal education covariates.

| <i>Predictors</i>                                    | <b>Alphabet Knowledge<br/>(Robust)</b> |                      |                  | <b>Conceptual Print Knowledge<br/>(Robust)</b> |                    |                  |
|------------------------------------------------------|----------------------------------------|----------------------|------------------|------------------------------------------------|--------------------|------------------|
|                                                      | <i>Est.</i>                            | <i>CI (95%)</i>      | <i>p-value</i>   | <i>Est.</i>                                    | <i>CI (95%)</i>    | <i>p-value</i>   |
| Intercept                                            | -0.91                                  | -1.23 – -0.60        | < .001           | -1.09                                          | -1.30 – -0.88      | < .001           |
| Time (centered at 1)                                 | <b>0.56</b>                            | <b>0.40 – 0.71</b>   | <b>&lt; .001</b> | <b>0.45</b>                                    | <b>0.41 – 0.49</b> | <b>&lt; .001</b> |
| Time: Quadratic                                      | <b>-0.04</b>                           | <b>-0.08 – -0.01</b> | <b>.035</b>      |                                                |                    |                  |
| Group (CNH)                                          | 0.06                                   | -0.34 – 0.46         | .776             | <b>0.38</b>                                    | <b>0.11 – 0.65</b> | <b>.006</b>      |
| Nonverbal IQ                                         | 0.15                                   | -0.06 – 0.36         | .165             | <b>0.24</b>                                    | <b>0.10 – 0.38</b> | <b>.001</b>      |
| Maternal Education                                   | 0.05                                   | -0.16 – 0.26         | .643             | 0.14                                           | -0.01 – 0.28       | .054             |
| <b>Random Effects</b>                                |                                        |                      |                  |                                                |                    |                  |
| $\sigma^2$                                           | 0.20                                   |                      |                  | 0.18                                           |                    |                  |
| $\tau_{00}$                                          | 0.49 <small>ChildID</small>            |                      |                  | 0.25 <small>ChildID</small>                    |                    |                  |
| ICC                                                  | 0.71                                   |                      |                  | 0.59                                           |                    |                  |
| N                                                    | 60 <small>ChildID</small>              |                      |                  | 60 <small>ChildID</small>                      |                    |                  |
| Observations                                         | 244                                    |                      |                  | 244                                            |                    |                  |
| Marginal R <sup>2</sup> / Conditional R <sup>2</sup> | 0.316 / 0.803                          |                      |                  | 0.530 / 0.805                                  |                    |                  |

*Note.* The intercept may be interpreted as the number of standard deviations below the sample mean a child with hearing loss would be predicted to score on the outcome at Time 1 (i.e., ~4 years old) for a child with a sample-average score for nonverbal IQ and maternal education. CNH = children with normal hearing. Nonverbal IQ was children's z-scored scores on the Primary Test of Nonverbal Intelligence (Ehrler & McGhee, 2008). Maternal education was measured on a 12-22 scale based on the number of years of education the child's mother reported completing. This value was also z-scored.
