# Supplementary material
Source: publisher figshare collection journal article supplement (https://asha.figshare.com/articles/dataset/_/21998153)
Supplement: Supplementary file 4 [file 1]

**Supplemental Material S9.** Sensitivity analyses: print knowledge growth models including age of amplification.

| <i>Predictors</i>                  | <b>Alphabet Knowledge<br/>(Robust)</b> |                      |                  | <b>Conceptual Print Knowledge<br/>(Robust)</b> |                      |                  |
|------------------------------------|----------------------------------------|----------------------|------------------|------------------------------------------------|----------------------|------------------|
|                                    | <i>Est.</i>                            | <i>CI (95%)</i>      | <i>p-value</i>   | <i>Est.</i>                                    | <i>CI (95%)</i>      | <i>p-value</i>   |
| Intercept                          | -1.01                                  | -1.32 – -0.70        | < .001           | -1.29                                          | -1.51 – -1.07        | < .001           |
| Time (centered at 1)               | <b>0.57</b>                            | <b>0.41 – 0.72</b>   | <b>&lt; .001</b> | <b>0.44</b>                                    | <b>0.40 – 0.49</b>   | <b>&lt; .001</b> |
| Time: Quadratic                    | <b>-0.04</b>                           | <b>-0.08 – -0.01</b> | <b>.034</b>      |                                                |                      |                  |
| Group (CNH)                        | 0.15                                   | -0.33 – 0.64         | .531             | 0.34                                           | -0.01 – 0.70         | .055             |
| Age of Amplification               | -0.05                                  | -0.33 – 0.23         | .742             | <b>-0.34</b>                                   | <b>-0.54 – -0.14</b> | <b>.001</b>      |
| <b>Random Effects</b>              |                                        |                      |                  |                                                |                      |                  |
| $\sigma^2$                         | 0.20                                   |                      |                  | 0.18                                           |                      |                  |
| $\tau_{00}$                        | 0.50 <small>ChildID</small>            |                      |                  | 0.25 <small>ChildID</small>                    |                      |                  |
| ICC                                | 0.71                                   |                      |                  | 0.59                                           |                      |                  |
| N                                  | 60 <small>ChildID</small>              |                      |                  | 60 <small>ChildID</small>                      |                      |                  |
| Observations                       | 245                                    |                      |                  | 244                                            |                      |                  |
| Marginal $R^2$ / Conditional $R^2$ | 0.293 / 0.798                          |                      |                  | 0.530 / 0.805                                  |                      |                  |

*Note.* The intercept may be interpreted as the number of standard deviations below the sample mean a child with hearing loss would be predicted to score on the outcome at Time 1 (i.e., ~4 years old) for a child with an average age of amplification based on the sample-average among participating children with hearing loss. This value was z-scored based on the mean and standard deviation for children with hearing loss. A single z-scored value corresponding with the age of zero was entered for children with normal hearing (CNH), to allow for inclusion of their data in the analyses.
