# Supplementary material
Source: publisher figshare collection journal article supplement (https://asha.figshare.com/articles/dataset/_/21998153)
Supplement: Supplementary file 6 [file 1]

**Supplemental Material S6.** Sensitivity analyses: phonological processing growth models including nonverbal IQ and maternal education covariates.

| <i>Predictors</i>                  | <b>Phonological Awareness<br/>(Robust)</b> |                      |                  | <b>Phonological Memory</b> |                    |                  | <b>Phonological Recoding<br/>(Robust)</b> |                      |                  |
|------------------------------------|--------------------------------------------|----------------------|------------------|----------------------------|--------------------|------------------|-------------------------------------------|----------------------|------------------|
|                                    | <i>Est.</i>                                | <i>CI (95%)</i>      | <i>p-value</i>   | <i>Est.</i>                | <i>CI (95%)</i>    | <i>p-value</i>   | <i>Est.</i>                               | <i>CI (95%)</i>      | <i>p-value</i>   |
| Intercept                          | -1.03                                      | -1.32 – -0.75        | < .001           | -0.86                      | -1.08 – -0.64      | < .001           | 0.56                                      | 0.27 – 0.86          | < .001           |
| Time (centered at 1)               | <b>0.60</b>                                | <b>0.46 – 0.75</b>   | <b>&lt; .001</b> | <b>0.29</b>                | <b>0.25 – 0.33</b> | <b>&lt; .001</b> | <b>-0.31</b>                              | <b>-0.35 – -0.27</b> | <b>&lt; .001</b> |
| Time: Quadratic                    | <b>-0.06</b>                               | <b>-0.09 – -0.02</b> | <b>.001</b>      |                            |                    |                  |                                           |                      |                  |
| Group (CNH)                        | 0.29                                       | -0.07 – 0.65         | .119             | <b>0.56</b>                | <b>0.27 – 0.86</b> | <b>&lt; .001</b> | 0.03                                      | -0.37 – 0.43         | .884             |
| Nonverbal IQ                       | <b>0.21</b>                                | <b>0.02 – 0.40</b>   | <b>.034</b>      | 0.13                       | -0.02 – 0.29       | .091             | -0.13                                     | -0.34 – 0.08         | .226             |
| Maternal Education                 | 0.07                                       | -0.12 – 0.26         | .474             | 0.15                       | -0.01 – 0.30       | .051             | -0.10                                     | -0.31 – 0.11         | .354             |
| <b>Random Effects</b>              |                                            |                      |                  |                            |                    |                  |                                           |                      |                  |
| $\sigma^2$                         | 0.17                                       |                      |                  | 0.18                       |                    |                  | 0.17                                      |                      |                  |
| $\tau_{00}$                        | 0.39                                       | ChildID              |                  | 0.25                       | ChildID            |                  | 0.48                                      | ChildID              |                  |
| ICC                                | 0.70                                       |                      |                  | 0.59                       |                    |                  | 0.74                                      |                      |                  |
| N                                  | 60                                         | ChildID              |                  | 60                         | ChildID            |                  | 60                                        | ChildID              |                  |
| Observations                       | 241                                        |                      |                  | 243                        |                    |                  | 239                                       |                      |                  |
| Marginal $R^2$ / Conditional $R^2$ | 0.387 / 0.814                              |                      |                  | 0.430 / 0.764              |                    |                  | 0.233 / 0.800                             |                      |                  |

*Note.* The intercept may be interpreted as the number of standard deviations below the sample mean a child with hearing loss would be predicted to score on the outcome at Time 1 (i.e., ~4 years old) for a child with a sample-average score for nonverbal IQ and maternal education. CNH = children with normal hearing. Nonverbal IQ was children's z-scored scores on the Primary Test of Nonverbal Intelligence (Ehrler & McGhee, 2008). Maternal education was measured on a 12-22 scale based on the number of years of education the child's mother reported completing. This value was also z-scored.
