# Supplementary material
Source: publisher figshare collection journal article supplement (https://asha.figshare.com/articles/dataset/_/21998153)
Supplement: Supplementary file 7 [file 1]

Supplemental Material S5.

# Letter Knowledge Assessment

Note: Form A is the published PALS-K subtests (Invernizzi et al., 2014) and administration follows published instructions.

# Letter Knowledge

## Form B

Based on Invernizzi et al. (2014)

Uppercase Letter Names

|   |   |   |   |
|---|---|---|---|
| M | P | E | R |
| G | A | B | N |
| C | Q | O | H |
| S | D | F | J |
| Y | W | U | K |
| Z | I | L | X |
| T | V |   |   |

Lowercase Letter Names

|   |   |   |   |
|---|---|---|---|
| j | q | w | p |
| n | e | z | i |
| k | b | d | m |
| g | y | a | f |
| t | v | c | r |
| u | l | o | h |
| x | s |   |   |

Letter Sounds

|    |   |    |   |
|----|---|----|---|
| C  | R | W  | J |
| O  | U | D  | K |
| F  | Z | SH | B |
| A  | N | E  | Y |
| TH | S | G  | T |
| V  | I | H  | P |
| CH | L |    |   |

Uppercase Letter Names Score \_\_\_\_\_

Lowercase Letter Names Score \_\_\_\_\_

Letter Sounds Score \_\_\_\_\_

# Letter Knowledge

## Form C

Based on Invernizzi et al. (2014)

### Uppercase Letter Names

|   |   |   |   |
|---|---|---|---|
| V | N | B | E |
| L | H | T | F |
| O | W | C | Z |
| P | M | I | U |
| J | K | G | A |
| D | Y | X | Q |
| S | R |   |   |

Uppercase Letter Names Score \_\_\_\_\_

### Lowercase Letter Names

|   |   |   |   |
|---|---|---|---|
| e | n | t | w |
| o | b | c | i |
| u | p | h | m |
| x | q | j | s |
| f | y | d | g |
| v | l | a | k |
| z | r |   |   |

Lowercase Letter Names Score \_\_\_\_\_

### Letter Sounds

|   |    |    |   |
|---|----|----|---|
| U | T  | G  | Z |
| L | D  | E  | A |
| K | CH | C  | V |
| P | TH | SH | Y |
| O | H  | W  | I |
| B | S  | N  | F |
| R | J  |    |   |

Letter Sounds Score \_\_\_\_\_

# Letter Knowledge

## Form D

Based on Invernizzi et al. (2014)

Uppercase Letter Names

|   |   |   |   |
|---|---|---|---|
| N | E | X | P |
| U | H | I | Z |
| C | L | F | G |
| J | W | D | M |
| K | S | T | Q |
| O | V | R | A |
| Y | B |   |   |

Lowercase Letter Names

|   |   |   |   |
|---|---|---|---|
| q | w | z | v |
| x | u | h | r |
| m | i | g | k |
| j | o | b | s |
| y | t | c | n |
| e | l | a | d |
| p | f |   |   |

Letter Sounds

|   |    |   |   |
|---|----|---|---|
| B | CH | Y | Z |
| N | A  | P | W |
| J | SH | E | V |
| U | Z  | I | O |
| L | G  | D | H |
| S | TH | T | F |
| C | K  |   |   |

Uppercase Letter Names Score \_\_\_\_\_

Lowercase Letter Names Score \_\_\_\_\_

Letter Sounds Score \_\_\_\_\_

# Letter Knowledge

## Form E

Based on Invernizzi et al. (2014)

Uppercase Letter Names

|   |   |   |   |
|---|---|---|---|
| V | K | Y | C |
| O | Q | F | R |
| E | Z | B | N |
| L | M | T | U |
| P | H | S | G |
| W | I | J | A |
| X | D |   |   |

Lowercase Letter Names

|   |   |   |   |
|---|---|---|---|
| w | o | y | s |
| z | a | e | i |
| c | b | x | q |
| t | j | d | n |
| k | h | m | l |
| g | p | v | u |
| r | f |   |   |

Letter Sounds

|   |    |    |   |
|---|----|----|---|
| H | B  | S  | K |
| J | Z  | TH | Z |
| I | O  | SH | W |
| A | CH | V  | R |
| F | Y  | T  | C |
| U | N  | E  | G |
| D | L  |    |   |

Uppercase Letter Names Score \_\_\_\_\_

Lowercase Letter Names Score \_\_\_\_\_

Letter Sounds Score \_\_\_\_\_
