# Supplementary material
Source: publisher figshare collection journal article supplement (https://asha.figshare.com/articles/dataset/_/21998153)
Supplement: Supplementary file 9 [file 1]

Supplemental Material S3.

# Nonword Repetition Assessment Forms

# Nonword Repetition

## Form A

Based on Gathercole and Adams (1993)

Say: *I am going to say some made-up words. You say exactly what I say. Let's try one. loit. [pause for response].*

If correct, say: *Great job! You said the made-up word like I said it. Let's do some more.*

If incorrect, say: *I want you to say the same thing I say. loit. Your turn.*

Instructions: Begin at 1 for all children. Administer all 15 items.

1. \_\_\_\_ tut /tʌt/
2. \_\_\_\_ derp /dɜp/
3. \_\_\_\_ bowp /baʊp/
4. \_\_\_\_ lawm /lam/
5. \_\_\_\_ gerk /gɜk/
6. \_\_\_\_ baamby /bambi/
7. \_\_\_\_ kuwlerd /kuləd/
8. \_\_\_\_ maylaan /meɪlan/
9. \_\_\_\_ kaalerg /kaləg/
10. \_\_\_\_ baarper /baəpə/
11. \_\_\_\_ kaelerdum /kælədəm/
12. \_\_\_\_ lihmowtel /limoutt/
13. \_\_\_\_ paembowly /pæmbaʊli/
14. \_\_\_\_ gluwmerot /gluməat/
15. \_\_\_\_ nemaanerd /nəmanəd/

Number Correct \_\_\_\_\_

# Nonword Repetition

## Form B

Based on Gathercole and Adams (1993)

Say: *I am going to say some made-up words. You say exactly what I say. Let's try one. loit. [pause for response].*

If correct, say: *Great job! You said the made-up word like I said it. Let's do some more.*

If incorrect, say: *I want you to say the same thing I say. loit. Your turn.*

Instructions: Begin at 1 for all children. Administer all 15 items.

1. \_\_\_\_gaam /gam/
2. \_\_\_\_neyg /neg/
3. \_\_\_\_nowb /nob/
4. \_\_\_\_merg /mɜːg/
5. \_\_\_\_lawl /laʊl/
6. \_\_\_\_pahperd /papeɪd/
7. \_\_\_\_taryer /taryə/
8. \_\_\_\_mihlowt /miləʊt/
9. \_\_\_\_baetern /bætəːn/
10. \_\_\_\_gernit /gəːnət/
11. \_\_\_\_beelaany /bilani/
12. \_\_\_\_daysiyter /desitə/
13. \_\_\_\_kulownerd /kuloʊnəd/
14. \_\_\_\_gaemperly /gæmpəːli/
15. \_\_\_\_potimly /poutɪmlɪ/

Number Correct \_\_\_\_\_

# Nonword Repetition

## Form C

Based on Gathercole and Adams (1993)

Say: *I am going to say some made-up words. You say exactly what I say. Let's try one. loit. [pause for response].*

If correct, say: *Great job! You said the made-up word like I said it. Let's do some more.*

If incorrect, say: *I want you to say the same thing I say. loit. Your turn.*

Instructions: Begin at 1 for all children. Administer all 15 items.

1. \_\_\_\_ naag /nag/
2. \_\_\_\_ kerg /kəg/
3. \_\_\_\_ bawn /ban/
4. \_\_\_\_ mayp /meɪp/
5. \_\_\_\_ glay /gleɪ/
6. \_\_\_\_ bangkey /beɪŋki/
7. \_\_\_\_ bahkuwn /bakun/
8. \_\_\_\_ meylerd /meɪləd/
9. \_\_\_\_ dihgayd /digeɪd/
10. \_\_\_\_ geydahd /geɪdɑd/
11. \_\_\_\_ baalowdum /balodəm/
12. \_\_\_\_ nepaaperd /nəpəpəd/
13. \_\_\_\_ glumerly /gluməli/
14. \_\_\_\_ lownerdem /lonədəm/
15. \_\_\_\_ keylerdum /kilədəm/

Number Correct \_\_\_\_\_

# Nonword Repetition

## Form D

Based on Gathercole and Adams (1993)

Say: *I am going to say some made-up words. You say exactly what I say. Let's try one. loit. [pause for response].*

If correct, say: *Great job! You said the made-up word like I said it. Let's do some more.*

If incorrect, say: *I want you to say the same thing I say. loit. Your turn.*

Instructions: Begin at 1 for all children. Administer all 15 items.

1. \_\_\_\_ derg /dɜːg/
2. \_\_\_\_ gowp /gaʊp/
3. \_\_\_\_ bayg /beg/
4. \_\_\_\_ muhl /mʌl/
5. \_\_\_\_ pawk /pak/
6. \_\_\_\_ lownerd /laʊnəːd/
7. \_\_\_\_ behgaht /beɪɡat/
8. \_\_\_\_ baarbaw /baəːba/
9. \_\_\_\_ gaadahd /ɡadad/
10. \_\_\_\_ nehterd /neɪtəːd/
11. \_\_\_\_ kaelerdly /kæləːdli/
12. \_\_\_\_ bowperot /baʊpəːat/
13. \_\_\_\_ limbaebow /lɪmbæːbaʊ/
14. \_\_\_\_ pahmerdel /paməːdɪ/
15. \_\_\_\_ maemerdot /mæməːdat/

Number Correct \_\_\_\_\_

# Nonword Repetition

## Form E

Based on Gathercole and Adams (1993)

Say: *I am going to say some made-up words. You say exactly what I say. Let's try one. loit. [pause for response].*

If correct, say: *Great job! You said the made-up word like I said it. Let's do some more.*

If incorrect, say: *I want you to say the same thing I say. loit. Your turn.*

Instructions: Begin at 1 for all children. Administer all 15 items.

1. \_\_\_\_ gahg /gag/
2. \_\_\_\_ nern /nɜ:n/
3. \_\_\_\_ miyg /maɪg/
4. \_\_\_\_ gowp /gop/
5. \_\_\_\_ luhd /lʌd/
6. \_\_\_\_ baarbuh /baəbə/
7. \_\_\_\_ luwterd /lutəd/
8. \_\_\_\_ kaalerm /kalə:m/
9. \_\_\_\_ lehkerd /leɪkəd/
10. \_\_\_\_ bahkuwn /bakun/
11. \_\_\_\_ lehgerdly /legədli/
12. \_\_\_\_ daypitem /deɪpitem/
13. \_\_\_\_ laynerdem /leɪnədɛm/
14. \_\_\_\_ negaalerd /nəgaləd/
15. \_\_\_\_ paaterdly /patədli/

**Number Correct** \_\_\_\_\_
